# Supplementary material for: Assessing the Protective Metabolome Using Machine Learning in World Trade Center Particulate Exposed Firefighters at Risk for Lung Injury
Source: PubMed Central journal article supplement (PMC6722247; doi:10.1038/s41598-019-48458-w), 2019-09-03
Supplement: 41598_2019_48458_MOESM1_ESM.pdf [file 41598_2019_48458_MOESM1_ESM.pdf]

# Assessing the Protective Metabolome Using Machine Learning in World Trade Center Particulate Exposed Firefighters at Risk for Lung Injury

George Crowley<sup>1</sup>, Sophia Kwon<sup>1</sup>, Dean F. Ostrofsky<sup>1</sup>, Emily A. Clementi<sup>1</sup>, Syed Hissam Haider<sup>1</sup>, Erin J. Caraher<sup>1</sup>, Rachel Lam<sup>1</sup>, David E. St-Jules<sup>2</sup>, Mengling Liu<sup>3, 4</sup>, David J. Prezant<sup>5, 6</sup>, Anna Nolan<sup>\*1, 3, 5</sup>

## Supplementary Information

### Supplementary Figure Legends

**Figure S1. Scree Plots.** Scree plots guide determination of the number of components to retain in principal components analysis of (A) the qualified metabolite profile and (B) the refined metabolite profile.

**Figure S2. 2-dimensional PCA Scores Plots.** 2-dimensional PCA scores plots provide a streamlined perspective of principal components analysis of (A) the qualified metabolite profile and (B) the refined metabolite profile.

**Figure S3. Random Forests Hyperparameter Tuning.** A. Qualified profile random forests were tuned to consistently identify the most discriminative metabolites by minimizing hamming distance and maximizing prospective refined profile membership consistency between replicate models of a given forest size. B. Refined profile random forests were tuned to maximize classification accuracy of replicate models of given forest size trained using 5-fold cross-validation.

### Supplementary Materials

**Table S1. Fold Changes of Metabolites in Qualified Profile.**

**Table S2. Fold Changes of Metabolites in Refined Profile.**

**Data S3. Raw Metabolite Data.**

**A.**

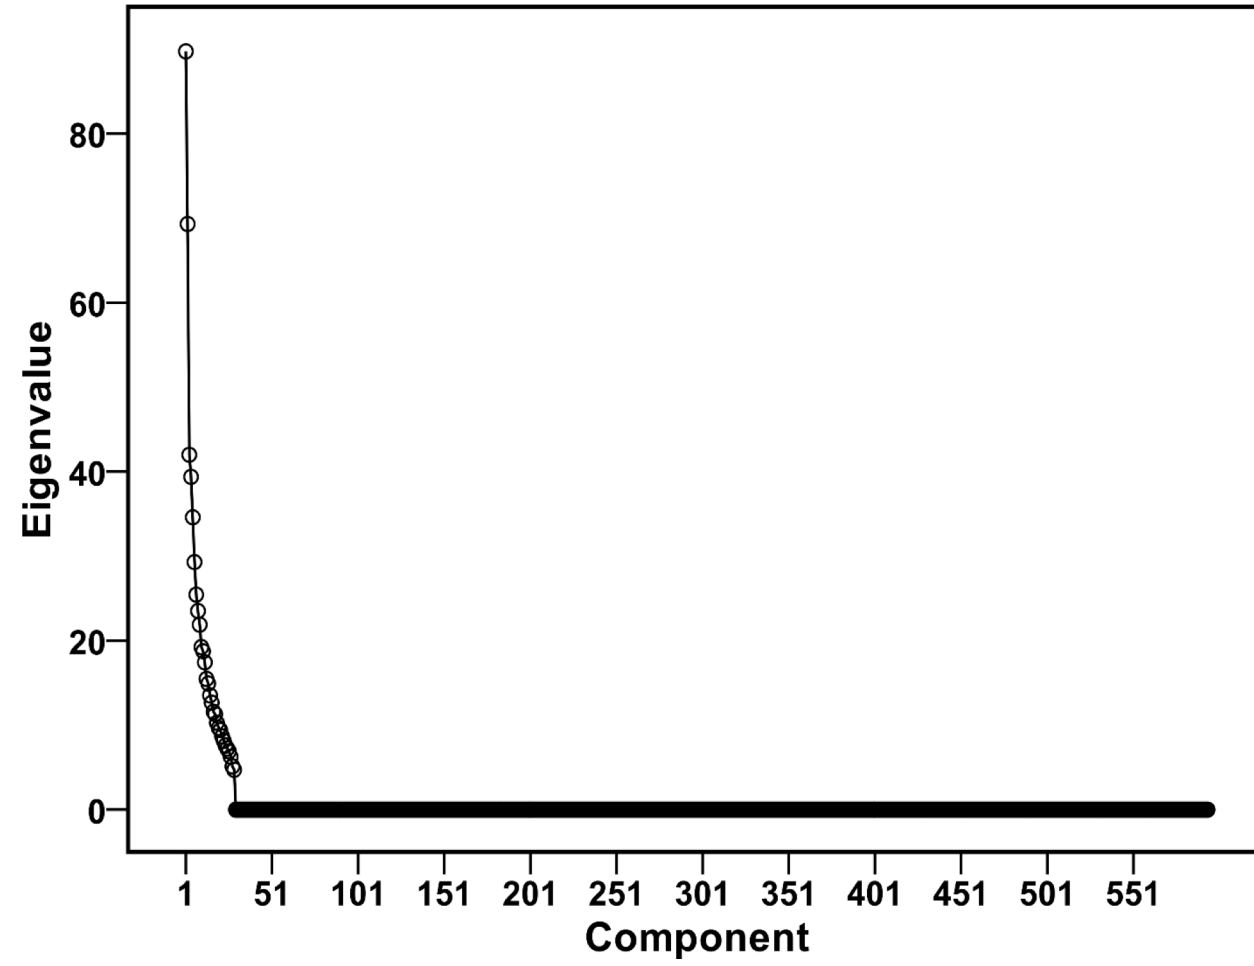

**B.**

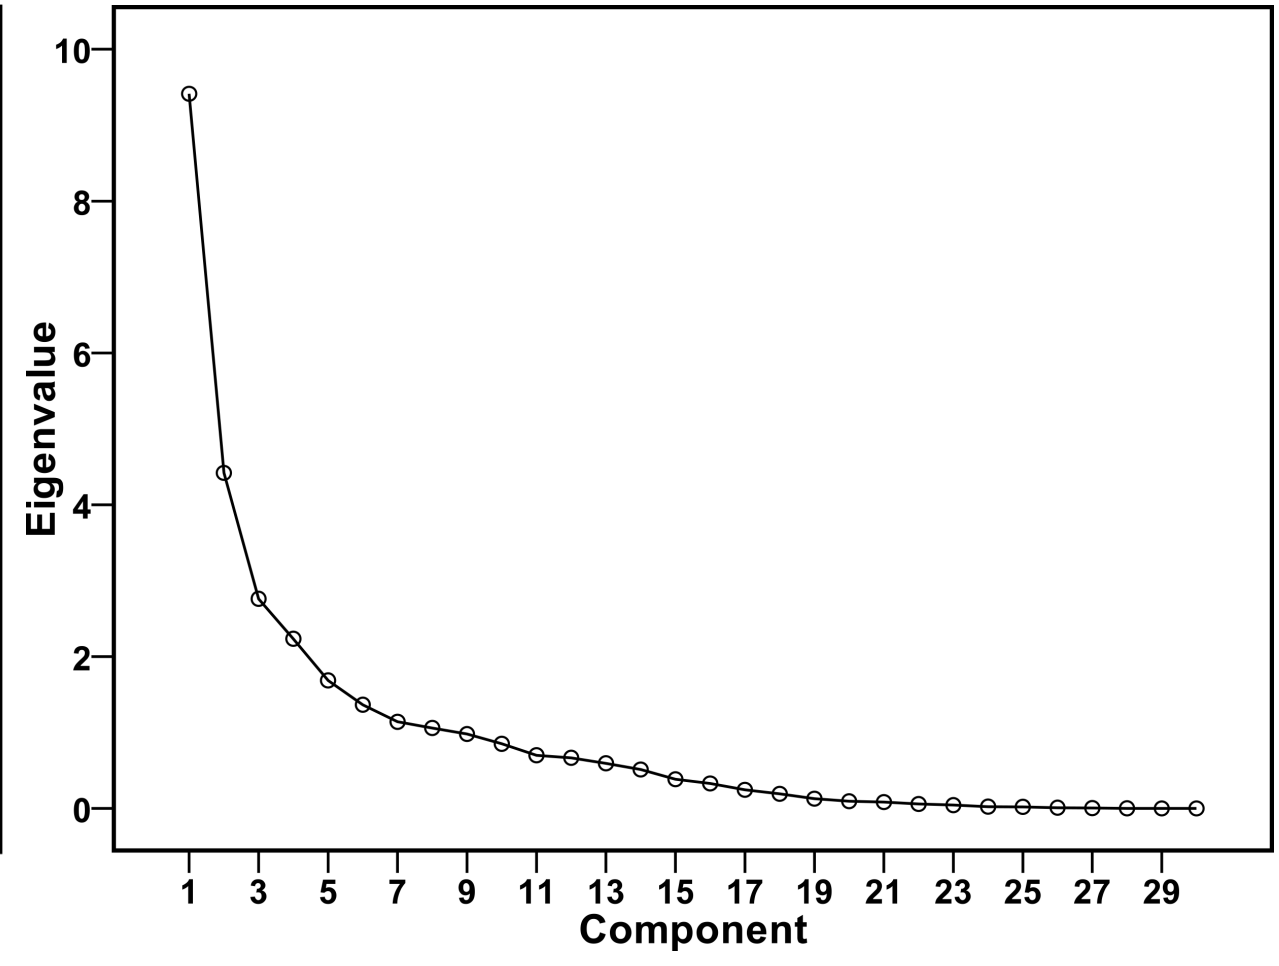

**Figure S1. Scree Plots.**

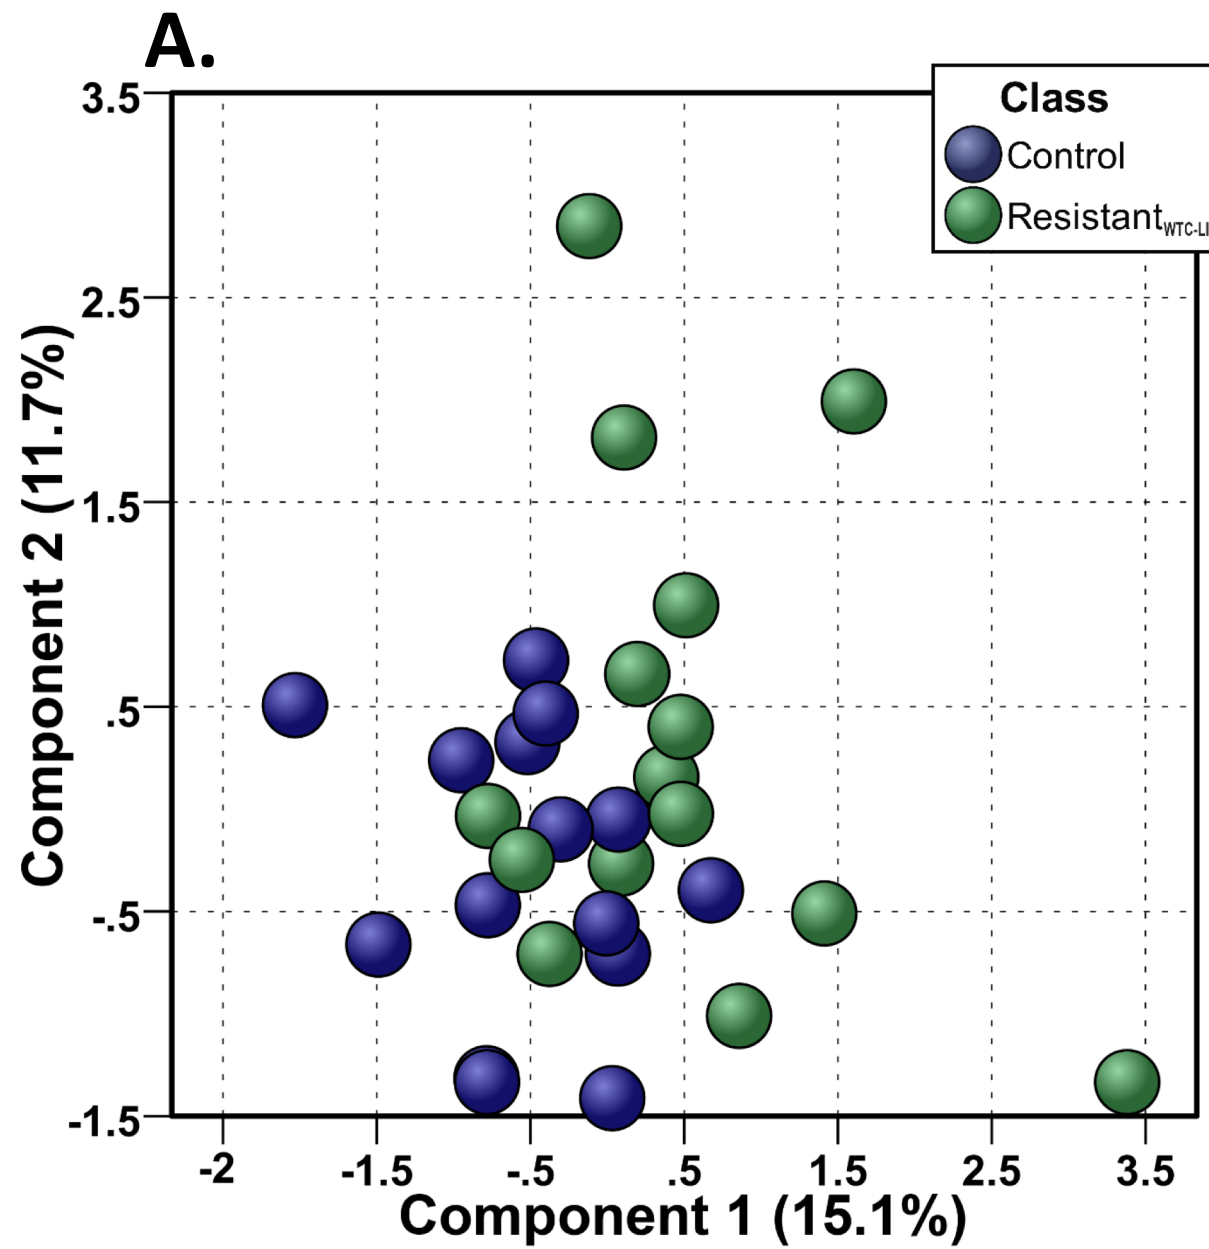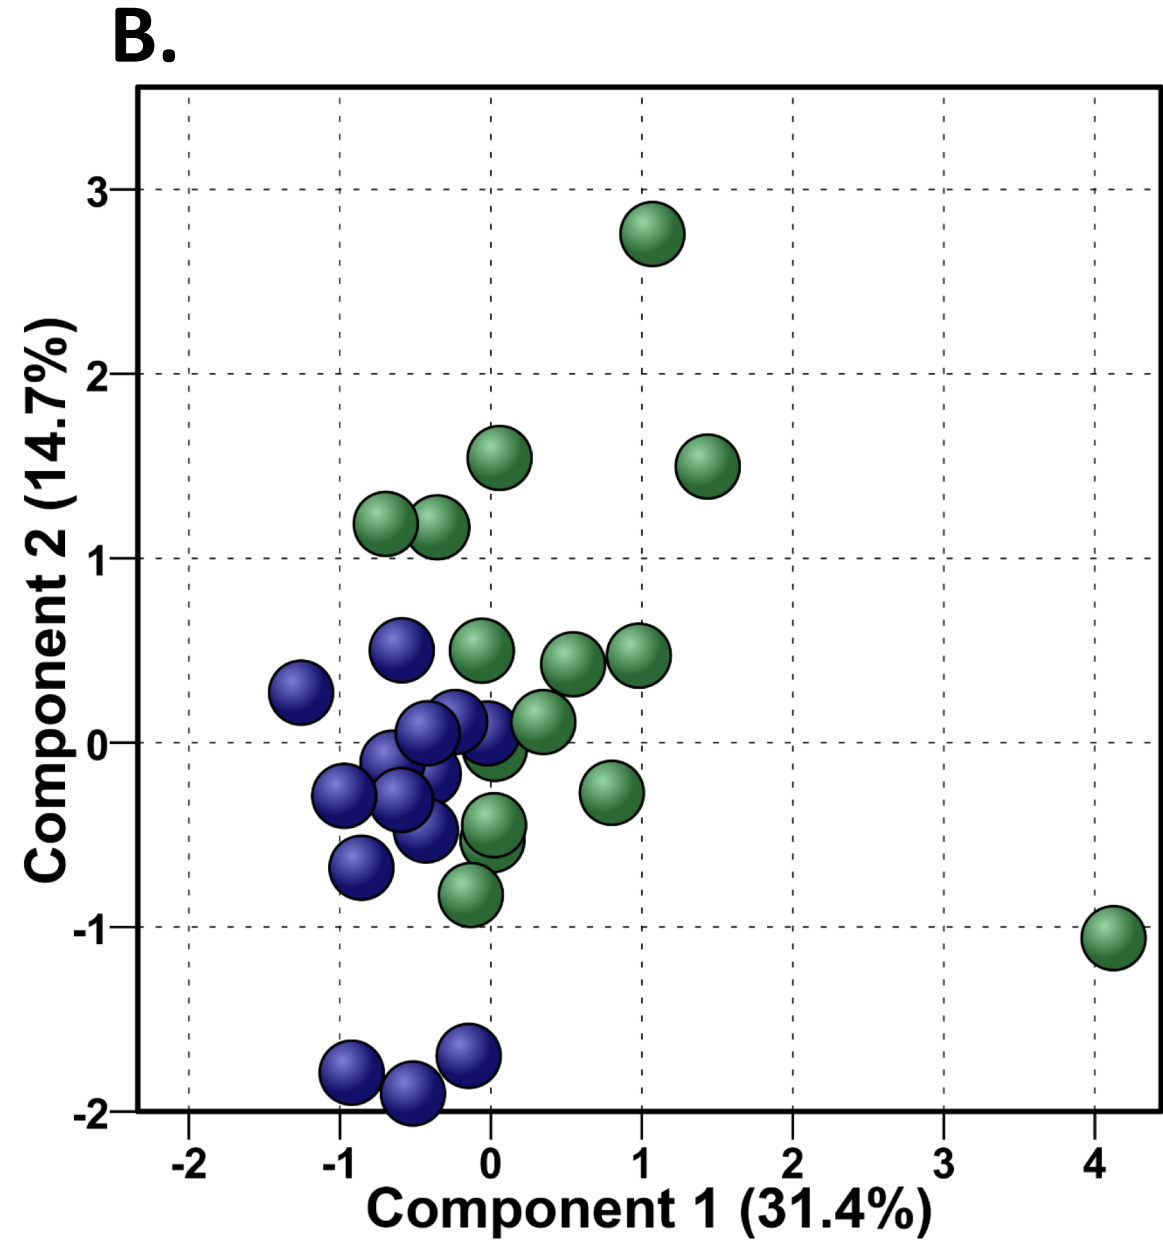

Figure S2. 2-dimensional PCA Scores Plots.

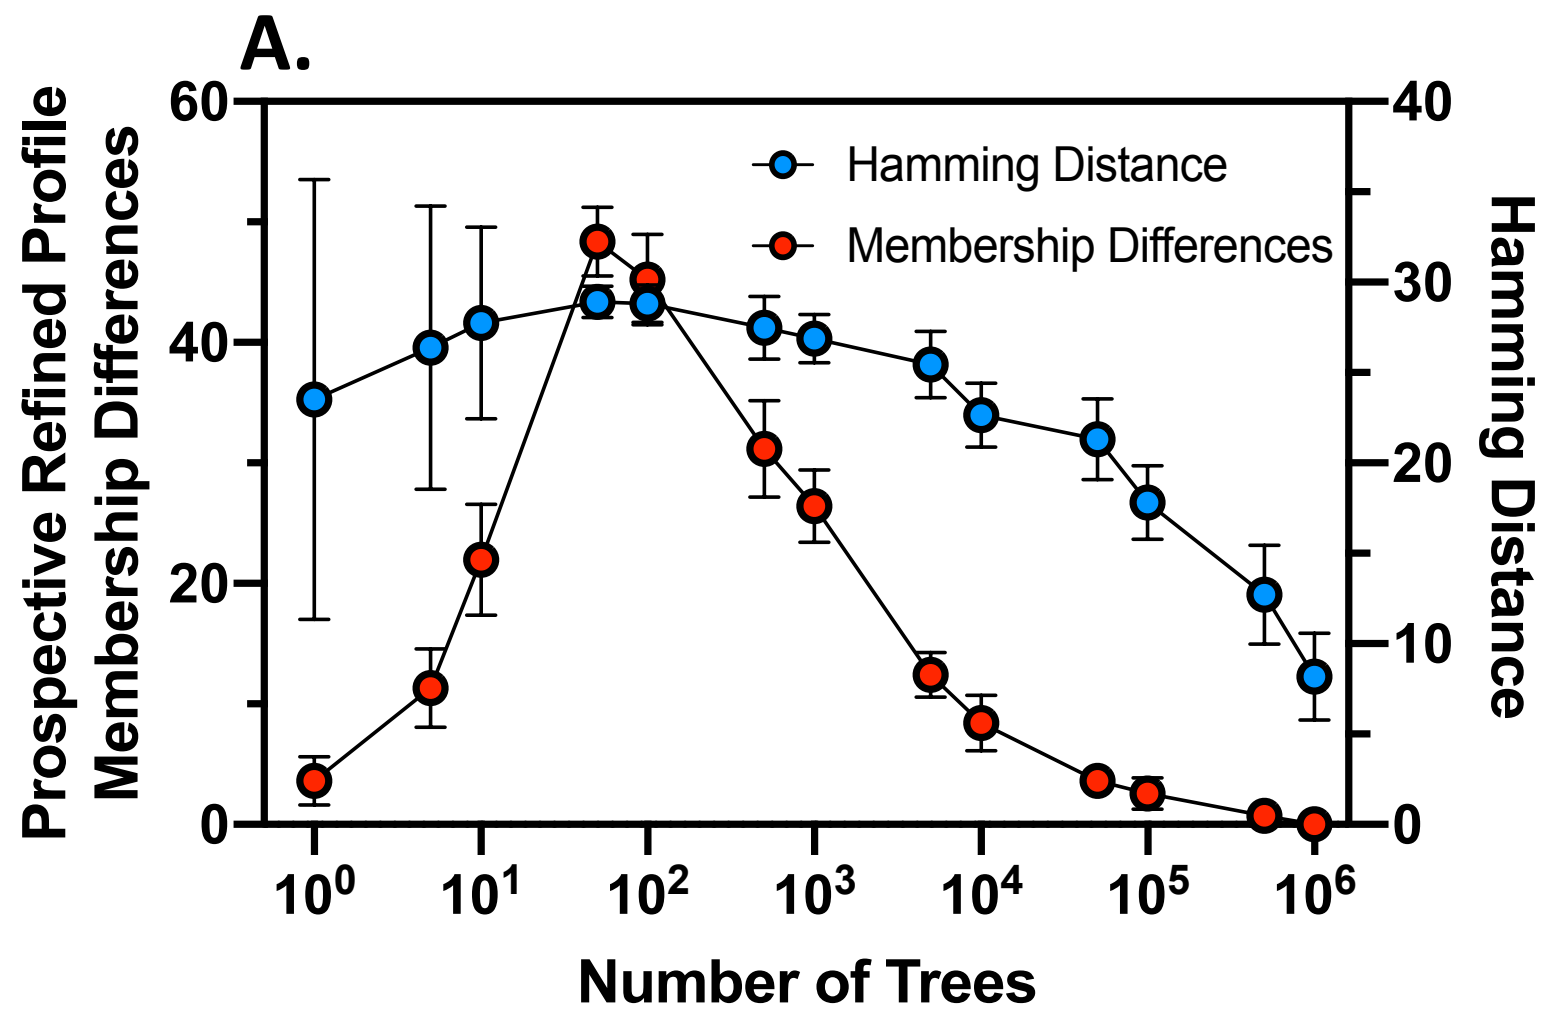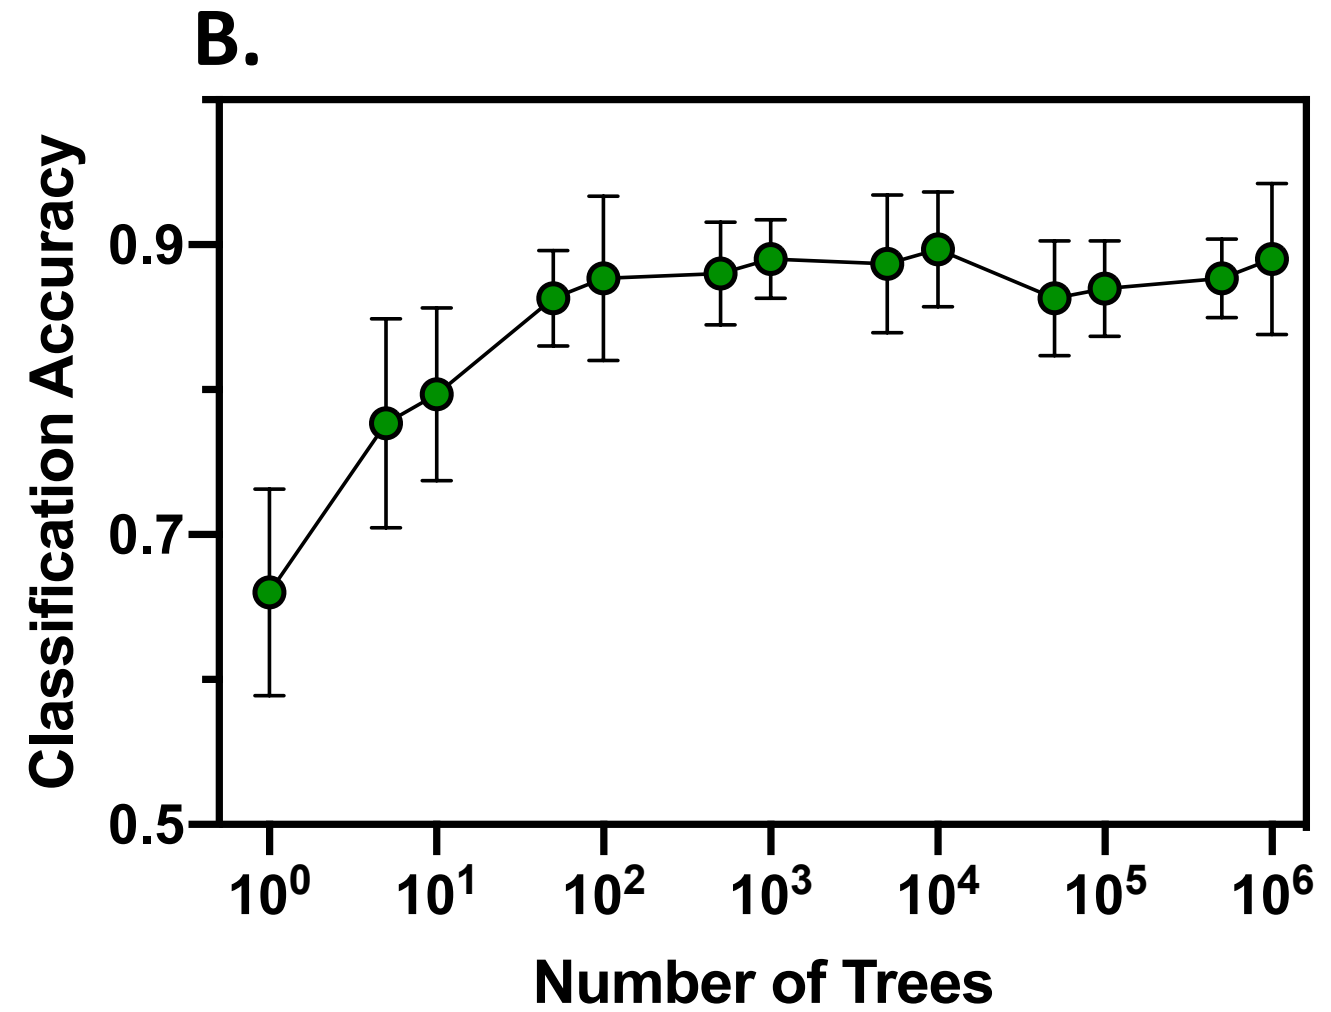

Figure S3. Random Forests Hyperparameter Tuning.

**Table S1. Fold Changes of Metabolites in Qualified Profile**

**Fold Change:  $\text{Resistant}_{\text{WTC-LI}}/\text{Control}$**

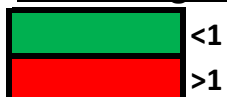

| Super Pathway                 | Sub Pathway                              | Metabolite                         | Comp ID | KEGG   | HMDB      | PubChem | $\text{Resistant}_{\text{WTC-LI}}/\text{Control}$ | CAS               | Retention Index | Mass   |
|-------------------------------|------------------------------------------|------------------------------------|---------|--------|-----------|---------|---------------------------------------------------|-------------------|-----------------|--------|
| Amino Acid                    | Glycine, Serine and Threonine Metabolism | glycine                            | 58      | C00037 | HMDB00123 | 750     | >1                                                | 56-40-6           | 1375            | 76.04  |
|                               |                                          | N-acetylglycine                    | 27710   |        | HMDB00532 | 10972   | >1                                                | 543-24-8          | 731             | 116.04 |
|                               |                                          | sarcosine                          | 1516    | C00213 | HMDB00271 | 1088    | <1                                                | 107-97-1          | 1280            | 90.05  |
|                               |                                          | dimethylglycine                    | 5086    | C01026 | HMDB00092 | 673     | <1                                                | 1118-68-9         | 1104            | 104.07 |
|                               |                                          | betaine                            | 3141    | C00719 | HMDB00043 | 247     | >1                                                | 107-43-7          | 1064            | 118.09 |
|                               |                                          | serine                             | 1648    | C00065 | HMDB00187 | 5951    | >1                                                | 56-45-1           | 1239            | 106.05 |
|                               |                                          | N-acetyserine                      | 37076   |        | HMDB02931 | 65249   | >1                                                | 97-14-3           | 2000            | 146.05 |
|                               |                                          | threonine                          | 1284    | C00188 | HMDB00167 | 6288    | >1                                                | 72-19-5           | 1514            | 120.07 |
|                               |                                          | N-acetylthreonine                  | 33939   |        |           | 152204  | >1                                                | 17093-74-2        | 821.6           | 160.06 |
|                               |                                          | allo-threonine                     | 15142   | C05519 | HMDB04041 | 99289   | >1                                                | 28954-12-3        | 2511.1          | 118.05 |
|                               | Alanine and Aspartate Metabolism         | alanine                            | 1126    | C00041 | HMDB00161 | 5950    | >1                                                | 56-41-7           | 1700            | 90.05  |
|                               |                                          | N-acetylaniline                    | 1585    | C02847 | HMDB00766 | 88064   | >1                                                | 97-69-8           | 861.2           | 130.05 |
|                               |                                          | aspartate                          | 443     | C00049 | HMDB00191 | 5960    | >1                                                | 56-84-8           | 1165            | 134.04 |
|                               |                                          | asparagine                         | 512     | C00152 | HMDB00168 | 6267    | >1                                                | 70-47-3           | 1225            | 133.06 |
|                               |                                          | N-acetylasparagine                 | 33942   |        | HMDB06028 | 99715   | >1                                                | 4033-40-3         | 785             | 175.07 |
|                               |                                          | N-acetylaspartate (NAA)            | 22185   | C01042 | HMDB00812 | 65065   | <1                                                | 997-55-7;997-55-7 | 880             | 176.06 |
|                               | Glutamate Metabolism                     | glutamate                          | 57      | C00025 | HMDB00148 | 611     | >1                                                | 56-86-0           | 1500            | 148.06 |
|                               |                                          | glutamine                          | 53      | C00064 | HMDB00641 | 5961    | >1                                                | 56-85-9           | 1291            | 147.08 |
|                               |                                          | N-acetylglutamate                  | 15720   | C00624 | HMDB01138 | 70914   | <1                                                | 8/3/5817          | 1050            | 190.07 |
|                               |                                          | N-acetylglutamine                  | 33943   | C02716 | HMDB06029 | 182230  | <1                                                | 2490-97-3         | 2140            | 187.07 |
|                               |                                          | N-acetyl-aspartyl-glutamate (NAAG) | 35665   | C12270 | HMDB01067 | 5255    | >1                                                | 3106-85-2         | 1035            | 305.1  |
| glutamate, gamma-methyl ester |                                          | 33487                              |         |        | 68662     | >1      | 1499-55-4                                         | 2170              | 162.08          |        |

|  |                                       |                            |        |        |           |           |      |                    |         |        |
|--|---------------------------------------|----------------------------|--------|--------|-----------|-----------|------|--------------------|---------|--------|
|  |                                       | pyroglutamine*             | 46225  |        |           | 134508    |      | 2353-44-8          | 1900    | 129.07 |
|  |                                       | beta-citrylglutamate       | 54923  |        |           |           |      | 73590-26-8         | 900     | 322.08 |
|  | Histidine Metabolism                  | histidine                  | 59     | C00135 | HMDB00177 | 6274      |      | 5934-29-2          | 755.9   | 154.06 |
|  |                                       | N-acetylhistidine          | 33946  | C02997 | HMDB32055 | 75619     |      | 39145-52-3         | 2088    | 196.07 |
|  |                                       | 1-methylhistidine          | 30460  | C01152 | HMDB00001 | 92105     |      | 332-80-9           | 2755    | 170.09 |
|  |                                       | 3-methylhistidine          | 15677  | C01152 | HMDB00479 | 64969     |      | 368-16-1           | 906.3   | 168.08 |
|  |                                       | hydantoin-5-propionic acid | 40473  | C05565 | HMDB01212 | 782       |      | 5624-26-0          | 2080    | 171.04 |
|  |                                       | imidazole propionate       | 40730  |        | HMDB02271 | 70630     |      | 1074-59-5          | 2263    | 141.07 |
|  |                                       | imidazole lactate          | 15716  | C05568 | HMDB02320 | 440129    |      | 14403-45-3         | 2040    | 157.06 |
|  |                                       | 1-methylimidazoleacetate   | 32350  | C05828 | HMDB02820 | 75810     |      | 2625-49-2          | 2064    | 141.07 |
|  |                                       | 4-imidazoleacetate         | 32349  | C02835 | HMDB02024 | 96215     |      | 645-65-8           | 2236    | 125.04 |
|  |                                       | Lysine Metabolism          | lysine | 1301   | C00047    | HMDB00182 | 5962 |                    | 56-87-1 | 2850   |
|  | N2-acetyllysine                       |                            | 36751  | C12989 | HMDB00446 | 92907     |      | 1946-82-3          | 3372.6  | 187.11 |
|  | N6-acetyllysine                       |                            | 36752  | C02727 | HMDB00206 | 92832     |      | 692-04-6           | 1059    | 187.11 |
|  | N6,N6,N6-trimethyllysine              |                            | 1498   | C03793 | HMDB01325 | 440120    |      | 23284-33-5         | 2825    | 189.16 |
|  | 5-hydroxylysine                       |                            | 15685  | C16741 | HMDB00450 | 1029      |      | 13204-98-3         | 2790    | 163.11 |
|  | 2-aminoadipate                        |                            | 6146   | C00956 | HMDB00510 | 469       |      | 542-32-5;1118-90-7 | 3500    | 160.06 |
|  | glutarate (pentanedioate)             |                            | 396    | C00489 | HMDB00661 | 743       |      | 110-94-1           | 2900    | 131.03 |
|  | glutaryl carnitine (C5)               |                            | 44664  |        | HMDB13130 | 71464488  |      | 102636-82-8        | 2393    | 276.14 |
|  | pipecolate                            |                            | 1444   | C00408 | HMDB00070 | 849       |      | 4043-87-2          | 2200    | 130.09 |
|  | 6-oxopiperidine-2-carboxylate         |                            | 43231  |        |           | 3014237   |      | 34622-39-4         | 1432    | 144.07 |
|  | Phenylalanine and Tyrosine Metabolism | phenylalanine              | 64     | C00079 | HMDB00159 | 6140      |      | 63-91-2            | 2878    | 166.09 |
|  |                                       | N-acetylphenylalanine      | 33950  | C03519 | HMDB00512 | 74839     |      | 2018-61-3          | 2597    | 206.08 |
|  |                                       | phenylpyruvate             | 566    | C00166 | HMDB00205 | 997       |      | 156-06-9           | 845     | 163.04 |
|  |                                       | phenyllactate (PLA)        | 22130  | C05607 | HMDB00779 | 3848      |      | 828-01-3           | 2208    | 165.06 |
|  |                                       | tyrosine                   | 1299   | C00082 | HMDB00158 | 6057      |      | 60-18-4            | 2430    | 182.08 |
|  |                                       | N-acetyltyrosine           | 32390  |        | HMDB00866 | 68310     |      | 537-55-3           | 1680    | 222.08 |

|  |                       |                                     |       |        |           |          |  |             |        |        |
|--|-----------------------|-------------------------------------|-------|--------|-----------|----------|--|-------------|--------|--------|
|  |                       | 4-hydroxyphenylpyruvate             | 1669  | C01179 | HMDB00707 | 979      |  | 156-39-8    | 1690.1 | 179.03 |
|  |                       | 3-(4-hydroxyphenyl)lactate          | 32197 | C03672 | HMDB00755 | 9378     |  | 6482-98-0   | 1379   | 181.05 |
|  |                       | phenol sulfate                      | 32553 | C02180 | HMDB60015 | 74426    |  | 937-34-8    | 2156   | 172.99 |
|  |                       | p-cresol sulfate                    | 36103 | C01468 | HMDB11635 | 4615423  |  | 3233-57-7   | 2890   | 187.01 |
|  |                       | vanillylmandelate (VMA)             | 1567  | C05584 | HMDB00291 | 1245     |  | 55-10-7     | 941    | 197.05 |
|  |                       | 3-methoxytyrosine                   | 12017 |        | HMDB01434 | 1670     |  | 300-48-1    | 1606   | 210.08 |
|  |                       | gentisate                           | 18280 | C00628 | HMDB00152 | 3469     |  | 490-79-9    | 905    | 153.02 |
|  |                       | 3-phenylpropionate (hydrocinnamate) | 15749 | C05629 | HMDB00764 | 107      |  | 501-52-0    | 2860   | 149.06 |
|  |                       | thyroxine                           | 2761  | C01829 | HMDB01918 | 5819     |  | 51-48-9     | 4808   | 775.68 |
|  |                       | 2-hydroxyphenylacetate              | 1432  | C05852 | HMDB00669 | 11970    |  | 614-75-5    | 858.6  | 151.04 |
|  |                       | dopamine sulfate (2)                | 48407 |        |           |          |  |             | 1556.2 | 232.03 |
|  |                       | p-cresol-glucuronide*               | 48841 |        | HMDB11686 | 154035   |  | 17680-99-8  | 2420   | 283.08 |
|  |                       | tyramine O-sulfate                  | 48408 |        | HMDB06409 | 153005   |  | 30223-92-8  | 1565   | 216.03 |
|  |                       | 5-bromotryptophan                   | 53242 |        |           | 96735    |  |             | 3525   | 280.99 |
|  | Tryptophan Metabolism | tryptophan                          | 54    | C00078 | HMDB00929 | 6305     |  | 73-22-3     | 2986   | 205.1  |
|  |                       | N-acetyltryptophan                  | 33959 | C03137 | HMDB13713 | 700653   |  | 1218-34-4   | 2630   | 245.09 |
|  |                       | indolelactate                       | 18349 | C02043 | HMDB00671 | 92904    |  | 832-97-3    | 2286   | 204.07 |
|  |                       | indoleacetate                       | 27513 | C00954 | HMDB00197 | 802      |  | 6505-45-9   | 2850   | 176.07 |
|  |                       | indolepropionate                    | 32405 |        | HMDB02302 | 3744     |  | 830-96-6    | 3205   | 190.09 |
|  |                       | 3-indoxyl sulfate                   | 27672 |        | HMDB00682 | 10258    |  | 2642-37-7   | 2222.2 | 212    |
|  |                       | kynurenine                          | 15140 | C00328 | HMDB00684 | 161166   |  | 2922-83-0   | 2739   | 209.09 |
|  |                       | kynurenate                          | 1417  | C01717 | HMDB00715 | 3845     |  | 492-27-3    | 2224   | 188.04 |
|  |                       | picolinate                          | 1512  | C10164 | HMDB02243 | 1018     |  | 98-98-6     | 910    | 124.04 |
|  |                       | 5-hydroxyindoleacetate              | 437   | C05635 | HMDB00763 | 1826     |  | 54-16-0     | 1510.2 | 190.05 |
|  |                       | serotonin                           | 2342  | C00780 | HMDB00259 | 5202     |  | 153-98-0    | 2550   | 177.1  |
|  |                       | tryptophan betaine                  | 37097 | C09213 | HMDB61115 | 442106   |  | 20671-76-5  | 2673   | 247.14 |
|  |                       | C-glycosyltryptophan                | 48782 |        |           | 10981970 |  | 180509-18-6 | 1777   | 365.14 |
|  |                       | 5-hydroxyindole sulfate             | 52914 |        |           |          |  |             | 1928   | 212    |

|                                           |  |                               |       |        |           |                   |  |                      |        |        |
|-------------------------------------------|--|-------------------------------|-------|--------|-----------|-------------------|--|----------------------|--------|--------|
|                                           |  | thioproline                   | 53231 |        |           | 93176;697360<br>9 |  | 34592-47-4           | 1250   | 134.03 |
| Leucine, Isoleucine and Valine Metabolism |  | leucine                       | 60    | C00123 | HMDB00687 | 6106              |  | 61-90-5              | 2864   | 132.1  |
|                                           |  | N-acetylleucine               | 1587  | C02710 | HMDB11756 | 70912             |  | 1188-21-2            | 2400   | 172.1  |
|                                           |  | 4-methyl-2-oxopentanoate      | 22116 | C00233 | HMDB00695 | 70                |  | 816-66-0             | 2170   | 129.06 |
|                                           |  | isovalerylglycine             | 35107 |        | HMDB00678 | 546304            |  | 16284-60-9           | 1950   | 158.08 |
|                                           |  | isovalerylcarnitine           | 34407 |        | HMDB00688 | 6426851           |  | 31023-24-2           | 3085   | 246.17 |
|                                           |  | beta-hydroxyisovalerate       | 12129 |        | HMDB00754 | 69362             |  | 625-08-1             | 1027   | 117.06 |
|                                           |  | 3-methylglutaconate           | 38667 |        | HMDB00522 | 1551553           |  | 5746-90-7            | 2579.6 | 143.03 |
|                                           |  | alpha-hydroxyisovalerate      | 33937 |        | HMDB00407 | 99823             |  | 600-37-3             | 1126   | 117.06 |
|                                           |  | methylsuccinate               | 15745 |        | HMDB01844 | 10349             |  | 498-21-5             | 2800   | 131.03 |
|                                           |  | isoleucine                    | 1125  | C00407 | HMDB00172 | 6306              |  | 73-32-5              | 2800   | 132.1  |
|                                           |  | N-acetylisoleucine            | 33967 |        |           | 2802421           |  | 3077-46-1            | 2325   | 172.1  |
|                                           |  | 3-methyl-2-oxobutyrate        | 44526 | C00141 | HMDB00019 | 49                |  | 3715-29-5            | 1465   | 115.04 |
|                                           |  | 3-methyl-2-oxovalerate        | 15676 | C00671 | HMDB03736 | 47                |  | 1460-34-0;51829-07-3 | 2064.2 | 129.06 |
|                                           |  | 2-methylbutyrylcarnitine (C5) | 45095 |        | HMDB00378 | 6426901           |  | 31023-25-3           | 3035   | 246.17 |
|                                           |  | 2-hydroxy-3-methylvalerate    | 36746 |        | HMDB00317 | 164623            |  | 488-15-3             | 1800   | 131.07 |
|                                           |  | 3-hydroxy-2-ethylpropionate   | 32397 |        | HMDB00396 | 188979            |  | 4374-62-3            | 975    | 117.06 |
|                                           |  | ethylmalonate                 | 15765 |        | HMDB00622 | 11756             |  | 601-75-2             | 2785   | 131.03 |
|                                           |  | valine                        | 1649  | C00183 | HMDB00883 | 6287              |  | 72-18-4              | 2479   | 118.09 |
|                                           |  | N-acetylvaline                | 1591  |        | HMDB11757 | 66789             |  | 96-81-1              | 1704   | 158.08 |
|                                           |  | isobutyrylcarnitine           | 33441 |        | HMDB00736 | 168379            |  | 25518-49-4           | 2810   | 232.15 |
|                                           |  | isobutyrylglycine             | 35437 |        | HMDB00730 | 10855600          |  | 15926-18-8           | 1420   | 144.07 |
|                                           |  | 3-hydroxyisobutyrate          | 1549  | C06001 | HMDB00336 | 87                |  | 2068-83-9            | 1619   | 103.04 |
|                                           |  | alpha-hydroxyisocaproate      | 22132 | C03264 | HMDB00746 | 83697             |  | 10303-64-7           | 1840   | 131.07 |
| Methionine, Cysteine, SAM and Taurine     |  | methionine                    | 1302  | C00073 | HMDB00696 | 6137              |  | 63-68-3              | 2526   | 150.06 |
|                                           |  | N-acetylmethionine            | 1589  | C02712 | HMDB11745 | 448580            |  | 65-82-7              | 1787   | 190.05 |
|                                           |  | N-formylmethionine            | 2829  | C03145 | HMDB01015 | 439750            |  | 4289-98-9            | 1543.8 | 176.04 |



|  |                                             |                                        |       |        |           |          |  |                 |        |        |
|--|---------------------------------------------|----------------------------------------|-------|--------|-----------|----------|--|-----------------|--------|--------|
|  |                                             | methionine sulfone                     | 44878 |        |           | 69961    |  | 820-10-0        | 1250   | 182.05 |
|  |                                             | methionine sulfoxide                   | 18374 | C02989 | HMDB02005 | 158980   |  | 3226-65-1       | 1272   | 166.05 |
|  |                                             | S-adenosylhomocysteine (SAH)           | 42382 | C00021 | HMDB00939 | 439155   |  | 979-92-0        | 1832.4 | 383.11 |
|  |                                             | 2-aminobutyrate                        | 42374 | C02261 | HMDB00650 | 439691   |  | 1492-24-6       | 2059   | 104.07 |
|  |                                             | cysteine                               | 1868  | C00097 | HMDB00574 | 5862     |  | 52-90-4;56-89-3 | 1488   | 122.03 |
|  |                                             | cystine                                | 56    | C00491 | HMDB00192 | 67678    |  | 56-89-3         | 2000   | 241.03 |
|  |                                             | S-methylcysteine                       | 39592 |        | HMDB02108 | 24417    |  | 1187-84-4       | 880    | 134.03 |
|  |                                             | cysteine s-sulfate                     | 22176 | C05824 | HMDB00731 | 115015   |  | 1637-71-4       | 565    | 201.98 |
|  |                                             | cysteine sulfinic acid                 | 37443 | C00606 | HMDB00996 | 109      |  | 207121-48-0     | 597    | 154.02 |
|  |                                             | hypotaurine                            | 590   | C00519 | HMDB00965 | 107812   |  | 300-84-5        | 724    | 110.03 |
|  |                                             | taurine                                | 2125  | C00245 | HMDB00251 | 1123     |  | 107-35-7        | 690    | 124.01 |
|  |                                             | N-acetyltaurine                        | 48187 |        |           | 159864   |  |                 | 600    | 168.03 |
|  |                                             | 2-hydroxybutyrate/2-hydroxyisobutyrate | 52281 |        |           |          |  |                 | 1258   | 103.04 |
|  | Urea cycle; Arginine and Proline Metabolism | arginine                               | 1638  | C00062 | HMDB00517 | 232      |  | 1119-34-2       | 2825   | 175.12 |
|  |                                             | urea                                   | 1670  | C00086 | HMDB00294 | 1176     |  | 57-13-6         | 700    | 121.07 |
|  |                                             | ornithine                              | 1493  | C00077 | HMDB03374 | 6262     |  | 3184-13-2       | 2800   | 133.1  |
|  |                                             | proline                                | 1898  | C00148 | HMDB00162 | 145742   |  | 147-85-3        | 1603   | 116.07 |
|  |                                             | citrulline                             | 2132  | C00327 | HMDB00904 | 9750     |  | 372-75-8        | 1520   | 176.1  |
|  |                                             | homoarginine                           | 22137 | C01924 | HMDB00670 | 9085     |  | 156-86-5        | 2882   | 189.13 |
|  |                                             | homocitrulline                         | 22138 | C02427 | HMDB00679 | 65072    |  | 1190-49-4       | 1908   | 190.12 |
|  |                                             | dimethylarginine (SDMA + ADMA)         | 36808 | C03626 | HMDB01539 | 123831   |  | 102783-24-4     | 2850   | 203.15 |
|  |                                             | N-acetylarginine                       | 33953 | C02562 | HMDB04620 | 67427    |  | 155-84-0        | 2245   | 217.13 |
|  |                                             | N-acetylproline                        | 34387 |        |           | 322640   |  | 1074-79-9       | 1695   | 158.08 |
|  |                                             | N-delta-acetylmithine                  | 43249 |        |           | 9920500  |  |                 | 858    | 173.09 |
|  |                                             | N-methylproline                        | 37431 |        |           | 557      |  | 475-11-6        | 1335   | 130.09 |
|  |                                             | trans-4-hydroxyproline                 | 32306 | C01157 | HMDB00725 | 5810     |  | 51-35-4         | 1064   | 132.07 |
|  |                                             | pro-hydroxy-pro                        | 35127 |        | HMDB06695 | 11673055 |  | 18684-24-7      | 2128   | 229.12 |

|         |                                    |                               |       |        |           |                 |  |                  |       |        |
|---------|------------------------------------|-------------------------------|-------|--------|-----------|-----------------|--|------------------|-------|--------|
|         |                                    | N-monomethylarginine          | 43586 | C03884 | HMDB29416 | 132862          |  | 53308-83-1       | 2845  | 189.13 |
|         |                                    | N-acetylcitrulline            | 48434 | C15532 | HMDB00856 | 656979          |  | 33965-42-3       | 940   | 216.1  |
|         | Creatine Metabolism                | creatine                      | 27718 | C00300 | HMDB00064 | 586             |  | 57-00-1          | 1947  | 132.08 |
|         |                                    | guanidinoacetate              | 43802 | C00581 | HMDB00128 | 763             |  | 352-97-6         | 1937  | 118.06 |
|         | Polyamine Metabolism               | acisoga                       | 43258 |        |           | 129397          |  | 106692-36-8      | 1813  | 185.13 |
|         |                                    | spermidine                    | 485   | C00315 | HMDB01257 | 1102            |  | 124-20-9         | 3355  | 146.17 |
|         |                                    | N(4)-acetylspermidine         | 32356 |        |           | 128317          |  | 66039-56-3       | 3095  | 188.18 |
|         |                                    | N-acetylputrescine            | 37496 | C02714 | HMDB02064 | 122356          |  | 18233-70-0       | 2230  | 131.12 |
|         |                                    | 4-acetamidobutanoate          | 1558  | C02946 | HMDB03681 | 18189           |  | 3025-96-5        | 1350  | 146.08 |
|         | Guanidino and Acetamido Metabolism | 1-methylguanidine             | 48114 | C02294 | HMDB01522 | 10111           |  | 22661-87-6       | 2149  | 74.07  |
|         |                                    | 4-guanidinobutanoate          | 15681 | C01035 | HMDB03464 | 500             |  | 463-003;463-00-3 | 2320  | 146.09 |
|         |                                    | guanidinosuccinate            | 32446 | C03139 | HMDB03157 | 97856           |  | 6133-30-8        | 3550  | 174.05 |
|         | Glutathione Metabolism             |                               |       |        |           |                 |  |                  |       |        |
|         |                                    | 5-oxoproline                  | 1494  | C01879 | HMDB00267 | 7405            |  | 98-79-3          | 738.5 | 128.04 |
| Peptide | Gamma-glutamyl Amino Acid          | gamma-glutamylalanine         | 37063 |        | HMDB29142 | 440103          |  | 5875-41-2        | 1986  | 219.1  |
|         |                                    | gamma-glutamylglutamate       | 36738 | C05282 | HMDB11737 | 92865           |  | 1116-22-9        | 1775  | 277.1  |
|         |                                    | gamma-glutamylglutamine       | 2730  | C05283 | HMDB11738 | 150914          |  | 10148-81-9       | 1430  | 276.12 |
|         |                                    | gamma-glutamylglycine         | 33949 |        | HMDB11667 | 165527          |  | 1948-29-4        | 1535  | 205.08 |
|         |                                    | gamma-glutamylhistidine       | 18245 |        |           | 7017195         |  | 37460-15-4       | 2740  | 285.12 |
|         |                                    | gamma-glutamylisoleucine*     | 34456 |        | HMDB11170 | 14253342        |  |                  | 2940  | 261.14 |
|         |                                    | gamma-glutamylleucine         | 18369 |        | HMDB11171 | 151023          |  | 2566-39-4        | 2991  | 261.14 |
|         |                                    | gamma-glutamyl-alpha-lysine   | 55015 |        |           | 65254           |  |                  | 2784  | 276.16 |
|         |                                    | gamma-glutamyl-epsilon-lysine | 33934 |        | HMDB03869 | 7015684;7015685 |  | 17105-15-6       | 2717  | 276.16 |
|         |                                    | gamma-glutamylmethionine      | 44872 |        | HMDB29155 | 7009567         |  | 17663-87-5       | 2640  | 279.1  |
|         |                                    | gamma-glutamylphenylalanine   | 33422 |        | HMDB00594 | 111299          |  | 7432-24-8        | 2992  | 295.13 |

|              |                                                      |                              |                       |        |           |                 |          |            |        |        |        |
|--------------|------------------------------------------------------|------------------------------|-----------------------|--------|-----------|-----------------|----------|------------|--------|--------|--------|
|              |                                                      | gamma-glutamylthreonine      | 33364                 |        | HMDB29159 |                 |          | 5652-48-2  | 1750   | 249.11 |        |
|              |                                                      | gamma-glutamyltryptophan     | 33947                 |        | HMDB29160 | 3989307         |          | 66471-20-3 | 1960   | 332.13 |        |
|              |                                                      | gamma-glutamyltyrosine       | 2734                  |        | HMDB11741 | 94340           |          | 7432-23-7  | 1240   | 309.11 |        |
|              |                                                      | gamma-glutamylvaline         | 43829                 |        | HMDB11172 | 7015683         |          | 2746-34-1  | 2700   | 247.13 |        |
|              |                                                      | gamma-glutamylserine         | 54914                 |        |           |                 |          | 5875-35-4  | 1351   | 235.09 |        |
|              | Dipeptide Derivative                                 |                              |                       |        |           |                 |          |            |        |        |        |
|              |                                                      | N-acetylcarnosine            | 43488                 |        | HMDB12881 | 9903482         |          | 56353-15-2 | 2141   | 269.12 |        |
|              | Dipeptide                                            | glycylvaline                 | 18357                 |        | HMDB28854 | 97417           |          | 1963-21-9  | 2734   | 175.11 |        |
|              |                                                      | histidylalanine              | 42027                 |        |           | 351667          |          | 16874-75-2 | 3014   | 227.11 |        |
|              |                                                      | leucylalanine                | 40010                 |        |           | 259321          |          | 7298-84-2  | 2801   | 203.14 |        |
|              |                                                      | leucylglycine                | 40045                 |        |           | 79070           |          | 686-50-0   | 2778   | 189.12 |        |
|              |                                                      | phenylalanyl glycine         | 41370                 |        |           | 98207           |          | 721-90-4   | 2462   | 221.09 |        |
|              |                                                      | prolylglycine                | 40703                 |        |           | 7408076;6426709 |          | 2578-57-6  | 2136   | 173.09 |        |
|              |                                                      | threonylphenylalanine        | 31530                 |        |           | 4099799;4099798 |          | 16875-27-7 | 2322   | 265.12 |        |
|              |                                                      | valylglutamine               | 42079                 |        |           | 5253209         |          | 42854-54-6 | 2295   | 246.14 |        |
|              |                                                      | valylglycine                 | 40475                 |        | HMDB29127 | 136487          |          | 686-43-1   | 1506   | 173.09 |        |
|              |                                                      | valylleucine                 | 39994                 |        | HMDB29131 | 352039          |          | 22906-55-4 | 3138   | 231.17 |        |
|              |                                                      | leucylglutamine*             | 53061                 |        |           | 4305457         |          |            | 1965   | 258.15 |        |
|              |                                                      | Acetylated Peptides          | phenylacetylglutamate | 52925  |           | HMDB59772       | 11579826 |            |        | 1630   | 264.09 |
|              | phenylacetylglutamine                                |                              | 35126                 | C04148 | HMDB06344 | 92258           |          | 28047-15-6 | 2330   | 263.1  |        |
| Carbohydrate | Glycolysis, Gluconeogenesis, and Pyruvate Metabolism | 1,5-anhydroglucitol (1,5-AG) | 20675                 | C07326 | HMDB02712 | 64960           |          | 154-58-5   | 802    | 163.06 |        |
|              |                                                      | glucose                      | 48152                 | C00031 | HMDB00122 | 79025           |          | 50-99-7    | 2342   | 225.06 |        |
|              |                                                      | pyruvate                     | 48990                 | C00022 | HMDB00243 | 1060            |          | 127-17-3   | 1083   | 87.01  |        |
|              |                                                      | lactate                      | 527                   | C00186 | HMDB00190 | 612             |          | 79-33-4    | 681.6  | 89.02  |        |
|              |                                                      | glycerate                    | 1572                  | C00258 | HMDB00139 | 752             |          | 600-19-1   | 2070.4 | 105.02 |        |
|              | Pentose Metabolism                                   | ribose                       | 1471                  | C00121 | HMDB00283 | 5779            |          | 50-69-1    | 1508.2 | 195.05 |        |
|              |                                                      | ribitol                      | 15772                 | C00474 | HMDB00508 | 6912            |          | 488-81-3   | 1789.6 | 151.06 |        |

|                     |                                            |                                           |                          |        |           |           |     |            |                              |        |        |
|---------------------|--------------------------------------------|-------------------------------------------|--------------------------|--------|-----------|-----------|-----|------------|------------------------------|--------|--------|
|                     |                                            | ribonate                                  | 27731                    | C01685 | HMDB00867 | 5460677   |     | 8/3/36     | 2425                         | 165.04 |        |
|                     |                                            | arabinose                                 | 575                      | C00216 | HMDB00646 | 66308     |     | 28697-53-2 | 1804.5                       | 195.05 |        |
|                     |                                            | arabitol/xylitol                          | 48885                    |        |           |           |     |            |                              | 1932.4 | 151.06 |
|                     |                                            | ribulose/xylulose                         | 54671                    |        |           |           |     |            |                              | 1400   | 195.05 |
|                     |                                            | arabonate/xylonate                        | 48255                    |        |           |           |     |            |                              | 2664.6 | 165.04 |
|                     | Disaccharides and Oligosaccharides         |                                           |                          |        |           |           |     |            |                              |        |        |
|                     |                                            | sucrose                                   | 1519                     | C00089 | HMDB00258 | 5988      |     |            | 57-50-1                      | 3092   | 387.11 |
|                     | Fructose, Mannose and Galactose Metabolism | fructose                                  | 48195                    | C00095 | HMDB00660 | 5984      |     |            | 57-48-7                      | 2022.2 | 225.06 |
|                     |                                            | mannitol/sorbitol                         | 46142                    | C01507 | HMDB00247 | 5780      |     |            |                              | 2260   | 181.07 |
|                     |                                            | mannose                                   | 48153                    | C00159 | HMDB00169 | 18950     |     |            | 3458-28-4                    | 2200   | 225.06 |
|                     |                                            | galactitol (dulcitol)                     | 1117                     | C01697 | HMDB00107 | 11850     |     |            | 608-66-2                     | 2309.7 | 181.07 |
|                     |                                            | galactonate                               | 27719                    | C00880 | HMDB00565 | 128869    |     |            | 299-28-5                     | 3085   | 195.05 |
|                     |                                            | glucuronate                               | 15443                    | C00191 | HMDB00127 | 444791    |     |            | 207300-70-7                  | 3233.3 | 193.04 |
|                     |                                            | N-acetylneuraminate                       | 32377                    | C00270 | HMDB00230 | 439197    |     |            | 131-48-6                     | 660    | 310.11 |
|                     | Aminosugar Metabolism                      | erythronate*                              | 42420                    |        | HMDB00613 | 2781043   |     |            | 88759-55-1                   | 2186   | 135.03 |
|                     |                                            | N-acetylglucosamine/N-acetylgalactosamine | 46539                    |        |           |           |     |            |                              | 715    | 222.1  |
|                     | Advanced Glycation End-product             |                                           |                          |        |           |           |     |            |                              |        |        |
|                     |                                            | N6-carboxymethyllysine                    | 36713                    |        |           |           |     |            | 4/3/46                       | 2500   | 205.12 |
|                     | Energy                                     | TCA Cycle                                 | citrate                  | 1564   | C00158    | HMDB00094 | 311 |            | 77-92-9                      | 582    | 191.02 |
|                     |                                            |                                           | aconitate [cis or trans] | 46173  | C00417    | HMDB00072 |     |            |                              | 580    | 173.01 |
| isocitrate          |                                            |                                           | 12110                    | C00311 | HMDB00193 | 1198      |     |            | 20226-99-7                   | 773    | 210.06 |
|                     |                                            |                                           |                          |        |           |           |     |            | 305-72-6;328-50-7;22202-68-2 |        |        |
| alpha-ketoglutarate |                                            |                                           | 528                      | C00026 | HMDB00208 | 51        |     |            |                              | 2700   | 145.01 |
| succinate           |                                            |                                           | 1437                     | C00042 | HMDB00254 | 1110      |     |            | 110-15-6                     | 3149   | 117.02 |

|       |                                    |                             |                       |        |           |           |         |                      |             |        |
|-------|------------------------------------|-----------------------------|-----------------------|--------|-----------|-----------|---------|----------------------|-------------|--------|
|       |                                    | fumarate                    | 1643                  | C00122 | HMDB00134 | 444972    |         | 100-17-8             | 3084        | 115    |
|       |                                    | malate                      | 1303                  | C00149 | HMDB00156 | 525       |         | 6915-15-7            | 615.6       | 133.01 |
|       |                                    | citraconate/glutaconate     | 47076                 |        |           |           |         |                      | 2600        | 129.02 |
|       |                                    | 2-methylcitrate/homocitrate | 52282                 |        |           |           |         |                      | 575         | 205.04 |
| Lipid | Medium Chain Fatty Acid            | caprate (10:0)              | 1642                  | C01571 | HMDB00511 | 2969      |         | 112-37-8             | 5090.7      | 171.14 |
|       |                                    | undecanoate (11:0)          | 12067                 | C17715 | HMDB00947 | 8180      |         | 334-48-5             | 5219.2      | 185.15 |
|       |                                    | 10-undecenoate (11:1n1)     | 32497                 |        |           |           |         | 1333-28-4            | 5085.8      | 183.14 |
|       |                                    | laurate (12:0)              | 1645                  | C02679 | HMDB00638 | 3893      |         | 143-07-7             | 5300        | 199.17 |
|       |                                    | 5-dodecenoate (12:1n7)      | 33968                 |        | HMDB00529 | 5312378   |         | 2430-94-6            | 5224        | 197.15 |
|       | Long Chain Fatty Acid              | myristate (14:0)            | 1365                  | C06424 | HMDB00806 | 11005     |         | 544-63-8             | 5440        | 227.2  |
|       |                                    | myristoleate (14:1n5)       | 32418                 | C08322 | HMDB02000 | 5281119   |         | 544-64-9             | 5346.9      | 225.19 |
|       |                                    | pentadecanoate (15:0)       | 1361                  | C16537 | HMDB00826 | 13849     |         | 1002-84-2;10002-84-2 | 5521        | 241.22 |
|       |                                    | palmitate (16:0)            | 1336                  | C00249 | HMDB00220 | 985       |         | 57-10-3              | 5618        | 255.23 |
|       |                                    | palmitoleate (16:1n7)       | 33447                 | C08362 | HMDB03229 | 445638    |         | 373-49-9             | 5475        | 253.22 |
|       |                                    | margarate (17:0)            | 1121                  |        | HMDB02259 | 10465     |         | 506-12-7             | 5731        | 269.25 |
|       |                                    | 10-heptadecenoate (17:1n7)  | 33971                 |        | HMDB60038 | 5312435   |         | 29743-97-3           | 5555        | 267.23 |
|       |                                    | stearate (18:0)             | 1358                  | C01530 | HMDB00827 | 5281      |         | 57-11-4              | 5872        | 283.26 |
|       |                                    | nonadecanoate (19:0)        | 1356                  | C16535 | HMDB00772 | 12591     |         | 646-30-0             | 6068        | 297.28 |
|       |                                    | 10-nonadecenoate (19:1n9)   | 33972                 |        | HMDB13622 | 5312513   |         | 73033-09-7           | 5780        | 295.26 |
|       |                                    | arachidate (20:0)           | 1118                  | C06425 | HMDB02212 | 10467     |         | 506-30-9             | 6295        | 311.3  |
|       |                                    | eicosenoate (20:1)          | 33587                 |        | HMDB02231 | 5282768   |         |                      | 5950        | 309.28 |
|       |                                    | erucate (22:1n9)            | 1552                  | C08316 | HMDB02068 | 5281116   |         | 112-86-7             | 6355.6      | 337.31 |
|       |                                    | oleate/vaccenate (18:1)     | 52285                 |        |           |           |         |                      | 5655        | 281.25 |
|       |                                    |                             | stearidonate (18:4n3) | 33969  | C16300    | HMDB06547 | 5312508 |                      | 111174-40-4 | 5395   |
|       | eicosapentaenoate (EPA; 20:5n3)    |                             | 18467                 | C06428 | HMDB01999 | 446284    |         | 10-2005-9;10417-94-4 | 5450        | 301.22 |
|       | docosapentaenoate (n3 DPA; 22:5n3) |                             | 32504                 | C16513 | HMDB01976 | 6441454   |         | 2234-74-4            | 5571        | 329.25 |

|                                        |                                            |       |        |           |          |  |            |        |        |
|----------------------------------------|--------------------------------------------|-------|--------|-----------|----------|--|------------|--------|--------|
| Polyunsaturated Fatty Acid (n3 and n6) | docosaehaenoate (DHA; 22:6n3)              | 44675 | C06429 | HMDB02183 | 445580   |  | 6217-54-5  | 5525   | 327.23 |
|                                        | linoleate (18:2n6)                         | 1105  | C01595 | HMDB00673 | 5280450  |  | 60-33-3    | 5535   | 279.23 |
|                                        | linolenate [alpha or gamma; (18:3n3 or 6)] | 34035 | C06426 | HMDB03073 | 5280934  |  |            | 5450   | 277.22 |
|                                        | dihomo-linolenate (20:3n3 or n6)           | 35718 | C03242 | HMDB02925 | 5280581  |  | 17046-59-2 | 5596   | 305.25 |
|                                        | arachidonate (20:4n6)                      | 1110  | C00219 | HMDB01043 | 444899   |  | 506-32-1   | 5535   | 303.23 |
|                                        | adrenate (22:4n6)                          | 32980 | C16527 | HMDB02226 | 5497181  |  | 2091-25-0  | 5678   | 331.26 |
|                                        | docosapentaenoate (n6 DPA; 22:5n6)         | 37478 | C16513 | HMDB01976 | 6441454  |  | 25182-74-5 | 5624.5 | 329.25 |
|                                        | docosadienoate (22:2n6)                    | 32415 | C16533 | HMDB61714 | 5282807  |  | 7370-49-2  | 6034   | 335.3  |
|                                        | dihomo-linoleate (20:2n6)                  | 17805 | C16525 | HMDB05060 | 6439848  |  | 2091-39-6  | 5730   | 307.26 |
|                                        | mead acid (20:3n9)                         | 35174 |        | HMDB10378 | 5312531  |  | 20590-32-3 | 5650   | 305.25 |
| Fatty Acid, Branched                   | 13-methylmyristate                         | 38293 |        |           | 151014   |  | 2485-71-4  | 5499   | 241.22 |
|                                        | 15-methylpalmitate                         | 38768 |        |           | 17903417 |  |            | 5695   | 269.25 |
|                                        | 17-methylstearate                          | 38296 |        |           | 3083779  |  | 2724-59-6  | 5993   | 297.28 |
| Fatty Acid, Dicarboxylate              | 3-methylglutarate/2-methylglutarate        | 54676 |        |           |          |  |            | 2832   | 145.05 |
|                                        | 2-hydroxyglutarate                         | 37253 | C02630 | HMDB00606 | 43       |  | 40951-21-1 | 3352.8 | 147.03 |
|                                        | adipate                                    | 21134 | C06104 | HMDB00448 | 196      |  | 124-04-9   | 3000   | 145.05 |
|                                        | 3-methyladipate                            | 36749 |        | HMDB00555 | 12292    |  | 1/3/58     | 2865   | 159.07 |
|                                        | maleate                                    | 20676 | C01384 | HMDB00176 | 444266   |  | 110-16-7   | 2510   | 115    |
|                                        | pimelate (heptanedioate)                   | 15704 | C02656 | HMDB00857 | 385      |  | 111-16-0   | 2745   | 159.07 |
|                                        | suberate (octanedioate)                    | 15730 | C08278 | HMDB00893 | 10457    |  | 505-48-6   | 804.3  | 173.08 |
|                                        | azelate (nonanedioate)                     | 18362 | C08261 | HMDB00784 | 2266     |  | 123-99-9   | 1276   | 187.1  |
|                                        | sebacate (decanedioate)                    | 32398 | C08277 | HMDB00792 | 5192     |  | 111-20-6   | 1788   | 201.11 |
|                                        | dodecanedioate                             | 32388 | C02678 | HMDB00623 | 12736    |  | 693-23-2   | 2990   | 229.14 |
|                                        | tetradecanedioate                          | 35669 |        | HMDB00872 | 13185    |  | 821-38-5   | 4000   | 257.18 |
|                                        | hexadecanedioate                           | 35678 | C19615 | HMDB00672 | 10459    |  | 505-54-4   | 4615   | 285.21 |
|                                        | octadecanedioate                           | 36754 |        | HMDB00782 | 70095    |  | 871-70-5   | 5043   | 313.24 |
|                                        | eicosanodioate                             | 39831 |        |           | 75502    |  | 2424-92-2  | 5200.9 | 341.27 |
|                                        | docosadioate                               | 39837 |        |           | 244872   |  | 505-56-6   | 5291.8 | 369.3  |

|                                              |  |                                                      |       |        |           |                  |  |                        |        |        |
|----------------------------------------------|--|------------------------------------------------------|-------|--------|-----------|------------------|--|------------------------|--------|--------|
|                                              |  | 3-carboxy-4-methyl-5-propyl-2-furanpropanoate (CMPF) | 31787 |        | HMDB61112 | 123979           |  | 86879-39-2             | 2840   | 239.09 |
| Fatty Acid, Amino                            |  | 2-aminoheptanoate                                    | 43761 |        |           | 227939           |  | 1115-90-8              | 3160   | 146.12 |
|                                              |  | 2-aminooctanoate                                     | 43343 |        | HMDB00991 | 69522            |  | 644-90-6               | 3385   | 158.12 |
| Fatty Acid, Keto                             |  | 1-dihomo-linoleoylglycerol (20:2)                    | 35103 |        |           |                  |  |                        | 6800   | 307.26 |
| Fatty Acid Synthesis                         |  | malonate                                             | 15872 | C00383 | HMDB00691 | 867              |  | 141-82-2;26522-22-85-0 | 3447   | 103    |
| Fatty Acid Metabolism (also BCAA Metabolism) |  | butyrylcarnitine                                     | 32412 | C02862 | HMDB02013 | 439829           |  | 25576-40-3             | 2860   | 232.15 |
|                                              |  | propionylcarnitine                                   | 32452 | C03017 | HMDB00824 | 107738           |  | 17298-37-2             | 2590   | 218.14 |
|                                              |  | propionylglycine                                     | 31932 |        | HMDB00783 | 98681            |  | 21709-90-0             | 1502.5 | 130.05 |
|                                              |  | methylmalonate (MMA)                                 | 1496  | C02170 | HMDB00202 | 487              |  | 516-05-2               | 3078.4 | 117.02 |
| Fatty Acid Metabolism (Acyl Glycine)         |  | N-palmitoylglycine                                   | 42092 |        |           | 151008           |  | 2441-41-0              | 5580   | 312.25 |
| Fatty Acid Metabolism(Acyl Carnitine)        |  | acetylcarnitine                                      | 32198 | C02571 | HMDB00201 | 1                |  | 5080-50-2              | 2282   | 204.12 |
|                                              |  | 3-hydroxybutyrylcarnitine (1)                        | 43264 |        | HMDB13127 | 53481617         |  |                        | 2400   | 248.15 |
|                                              |  | hexanoylcarnitine                                    | 32328 |        | HMDB00705 | 6426853          |  | 6920-35-0              | 3308   | 260.19 |
|                                              |  | octanoylcarnitine                                    | 33936 | C02838 | HMDB00791 | 123701           |  | 3671-77-0              | 950    | 288.22 |
|                                              |  | decanoylcarnitine                                    | 33941 |        | HMDB00651 | 10245190         |  | 1492-27-9              | 1130   | 316.25 |
|                                              |  | cis-4-decenoyl carnitine                             | 38178 |        |           |                  |  | 98930-66-6             | 1057   | 314.23 |
|                                              |  | myristoylcarnitine                                   | 33952 |        | HMDB05066 | 53477791         |  | 18822-89-4             | 1350   | 372.31 |
|                                              |  | palmitoylcarnitine                                   | 44681 | C02990 | HMDB00222 | 461              |  | 6865-14-1              | 1425   | 400.34 |
|                                              |  | palmitoleoylcarnitine*                               | 53223 |        |           |                  |  |                        | 1357   | 398.33 |
|                                              |  | stearoylcarnitine                                    | 34409 |        | HMDB00848 | 6426855          |  | 18822-91-8             | 1485   | 428.37 |
|                                              |  | linoleoylcarnitine*                                  | 46223 |        | HMDB06469 | 6450015          |  | 36816-10-1             | 1430   | 424.34 |
|                                              |  | oleoylcarnitine                                      | 35160 |        | HMDB05065 | 6441392;53477789 |  | 38677-66-6             | 1423   | 426.36 |

|                         |                       |                          |              |        |           |           |          |                  |             |        |
|-------------------------|-----------------------|--------------------------|--------------|--------|-----------|-----------|----------|------------------|-------------|--------|
|                         |                       | myristoleoylcarnitine*   | 48182        |        |           |           |          | 889848-55-9      | 1316        | 370.29 |
| Carnitine Metabolism    |                       | deoxycarnitine           | 36747        | C01181 | HMDB01161 | 134       |          | 6249-56-5        | 2052        | 146.12 |
|                         |                       | carnitine                | 15500        | C00318 | HMDB00062 | 10917     |          | 461-05-2         | 1978        | 162.11 |
| Ketone Bodies           |                       | 3-hydroxybutyrate (BHBA) | 542          | C01089 | HMDB00357 | 441       |          | 625-72-9         | 1443.3      | 103.04 |
|                         |                       | 2-hydroxyoctanoate       | 22036        |        | HMDB02264 | 94180     |          | 617-73-2         | 3736.8      | 159.1  |
| Fatty Acid, Monohydroxy |                       | 2-hydroxydecanoate       | 42489        |        |           | 21488     |          | 5393-81-7        | 4840        | 187.13 |
|                         |                       | 2-hydroxypalmitate       | 35675        |        | HMDB31057 | 92836     |          | 764-67-0         | 5511.2      | 271.23 |
|                         |                       | 2-hydroxystearate        | 17945        | C03045 |           | 69417     |          | 629-22-1         | 5695        | 299.26 |
|                         |                       | 3-hydroxyhexanoate       | 53230        |        |           | 151492    |          | 10191-24-9       | 1725        | 131.07 |
|                         |                       | 3-hydroxyoctanoate       | 22001        |        | HMDB01954 | 26613     |          | 88930-08-9       | 3446        | 159.1  |
|                         |                       | 3-hydroxydecanoate       | 22053        |        | HMDB02203 | 26612     |          | 5561-87-5        | 4634.7      | 187.13 |
|                         |                       | 3-hydroxylaurate         | 32457        |        | HMDB00387 | 94216     |          | 53941-38-1       | 5175        | 215.17 |
|                         |                       | 16-hydroxypalmitate      | 39609        | C18218 | HMDB06294 | 10466     |          | 506-13-8         | 5236.2      | 271.23 |
|                         |                       | 13-HODE + 9-HODE         | 37752        |        |           | 43013     |          |                  | 5275        | 295.23 |
|                         |                       | 3-hydroxystearate        | 52938        |        |           | 5282907   |          | 45261-96-9       | 5674        | 299.26 |
|                         |                       | 2-hydroxylaurate         | 52916        |        |           | 97783     |          | 2984-55-6        | 5211        | 215.17 |
|                         | Fatty Acid, Dihydroxy |                          | 12,13-DiHOME | 38395  | C14829    | HMDB04705 | 10236635 |                  | 263399-35-5 | 5137   |
|                         |                       | 9,10-DiHOME              | 38399        | C14828 | HMDB04704 | 9966640   |          | 263399-34-4      | 5180        | 313.24 |
| Eicosanoid              |                       | leukotriene B4           | 37530        | C02165 | HMDB01085 | 5280492   |          | 71160-24-2       | 5186        | 335.22 |
|                         |                       | 9-HETE                   | 46301        |        | HMDB10222 | 5312978   |          |                  | 5341        | 319.23 |
| Endocanna binoid        |                       | oleoyl ethanolamide      | 38102        |        | HMDB02088 | 5283454   |          | 11-58-0;111-58-0 | 6400        | 324.29 |
|                         |                       | palmitoyl ethanolamide   | 38165        | C16512 | HMDB02100 | 4671      |          | 544-31-0         | 6300        | 298.28 |



|  |                         |                                              |       |        |           |          |  |                       |        |        |
|--|-------------------------|----------------------------------------------|-------|--------|-----------|----------|--|-----------------------|--------|--------|
|  |                         | linoleoyl ethanolamide                       | 52608 |        | HMDB12252 | 5283446  |  | 68171-52-8            | 6150   | 322.28 |
|  | Inositol Metabolism     |                                              |       |        |           |          |  |                       |        |        |
|  |                         | myo-inositol                                 | 1124  | C00137 | HMDB00211 | 892      |  | 87-89-8               | 3506.3 | 225.06 |
|  | Phospholipid Metabolism | choline                                      | 15506 | C00114 | HMDB00097 | 305      |  | 67-48-1               | 1961   | 104.11 |
|  |                         | choline phosphate                            | 34396 | C00588 | HMDB01565 | 1014     |  | 72556-74-2            | 700    | 184.07 |
|  |                         | glycerophosphorylcholine (GPC)               | 15990 | C00670 | HMDB00086 | 71920    |  | 28319-77-9            | 672    | 258.11 |
|  |                         | glycerophosphoethanolamine                   | 37455 | C01233 | HMDB00114 | 123874   |  | 33049-08-0            | 659    | 216.06 |
|  |                         | trimethylamine N-oxide                       | 40406 | C01104 | HMDB00925 | 1145     |  | 1184-78-7             | 2100   | 76.08  |
|  |                         | glycerophosphoinositol*                      | 47155 |        |           |          |  | 16824-65-0            | 3850   | 333.06 |
|  |                         | 1,2-dipalmitoyl-GPC (16:0/16:0)              | 19130 |        | HMDB00564 | 452110   |  | 63-89-8               | 2365   | 734.57 |
|  |                         | 1-palmitoyl-2-oleoyl-GPC (16:0/18:1)         | 52461 |        |           | 6436017  |  | 26853-31-6;26853-31-6 | 2358   | 760.59 |
|  |                         | 1-palmitoyl-2-linoleoyl-GPC (16:0/18:2)      | 42446 |        |           | 5287971  |  | 40811-94-7            | 2160   | 758.57 |
|  |                         | 1-stearoyl-2-arachidonoyl-GPC (18:0/20:4)    | 42450 |        |           | 16219824 |  | 35418-59-8            | 2300   | 810.6  |
|  |                         | 1-stearoyl-2-oleoyl-GPC (18:0/18:1)          | 52438 |        |           |          |  | 56421-10-4            | 2644   | 788.62 |
|  |                         | 1-stearoyl-2-oleoyl-GPI (18:0/18:1)*         | 52726 |        |           |          |  |                       | 3711   | 882.61 |
|  |                         | 1,2-dioleoyl-GPC (18:1/18:1)*                | 52457 |        |           | 10350317 |  | 4235-95-4             | 2346   | 786.6  |
|  |                         | 1-palmitoyl-2-arachidonoyl-GPC (16:0/20:4n6) | 52462 |        |           | 10747814 |  | 35418-58-7            | 2091   | 782.57 |
|  |                         | 1-stearoyl-2-linoleoyl-GPC (18:0/18:2)*      | 52452 |        |           |          |  |                       | 2380   | 786.6  |
|  |                         | 1-linoleoyl-2-linolenoyl-GPC (18:2/18:3)*    | 53176 |        |           |          |  |                       | 1939   | 780.55 |
|  |                         | 1-palmitoyl-2-palmitoleoyl-GPC (16:0/16:1)*  | 52470 |        |           |          |  |                       | 2160   | 732.55 |
|  |                         | 1-stearoyl-2-arachidonoyl-GPI (18:0/20:4)    | 52449 |        |           |          |  |                       | 3000   | 904.59 |
|  |                         | 1-oleoyl-2-linoleoyl-GPC (18:1/18:2)*        | 52453 |        |           |          |  |                       | 2165   | 784.59 |
|  |                         | 1-palmitoyl-2-linoleoyl-GPI (16:0/18:2)      | 52450 |        |           |          |  |                       | 2730   | 852.56 |
|  |                         | 1-palmitoyl-2-arachidonoyl-GPI (16:0/20:4)*  | 52467 |        |           |          |  |                       | 2567   | 876.56 |
|  |                         | 1-stearoyl-2-linoleoyl-GPI (18:0/18:2)       | 52468 |        |           |          |  |                       | 3185   | 880.59 |
|  |                         | 1-palmitoyl-2-oleoyl-GPE (16:0/18:1)         | 19263 |        | HMDB05320 | 5283496  |  | 26662-94-2            | 2509   | 718.54 |

|           |                                                   |       |        |           |          |  |            |      |        |
|-----------|---------------------------------------------------|-------|--------|-----------|----------|--|------------|------|--------|
|           | 1-stearoyl-2-arachidonoyl-GPE (18:0/20:4)         | 52447 |        |           | 5289133  |  |            | 2424 | 768.55 |
|           | 1-stearoyl-2-oleoyl-GPE (18:0/18:1)               | 42448 |        |           |          |  |            | 2858 | 746.57 |
|           | 1-palmitoyl-2-arachidonoyl-GPE (16:0/20:4)*       | 52464 |        | HMDB05323 | 9546800  |  |            | 2198 | 740.52 |
|           | 1-palmitoyl-2-linoleoyl-GPE (16:0/18:2)           | 42449 |        | HMDB05322 | 9546747  |  |            | 2275 | 716.52 |
|           | 1-stearoyl-2-linoleoyl-GPE (18:0/18:2)*           | 52446 |        |           | 9546749  |  |            | 2522 | 744.55 |
|           | 1-palmitoyl-2-stearoyl-GPC (16:0/18:0)            | 52616 |        |           |          |  | 59403-51-9 | 2653 | 762.6  |
|           | 1,2-dioleoyl-GPE (18:1/18:1)                      | 52609 |        |           | 9546757  |  | 5/1/04     | 2485 | 744.55 |
|           | 1-palmitoyl-2-oleoyl-GPI (16:0/18:1)*             | 52669 |        |           |          |  |            | 3140 | 854.58 |
|           | 1-palmitoyl-2-alpha-linolenoyl-GPC (16:0/18:3n3)* | 52684 |        |           |          |  |            | 2034 | 756.55 |
|           | 1-palmitoleoyl-2-linoleoyl-GPC (16:1/18:2)*       | 52683 |        |           |          |  |            | 2003 | 756.55 |
|           | 1,2-dilinoleoyl-GPC (18:2/18:2)                   | 52603 |        |           | 5288075  |  | 998-06-1   | 2006 | 782.57 |
|           | 1,2-dilinoleoyl-GPE (18:2/18:2)*                  | 53174 |        |           | 9546812  |  |            | 2083 | 740.52 |
|           | 1-oleoyl-2-linoleoyl-GPE (18:1/18:2)*             | 52687 |        | HMDB05349 | 9546753  |  |            | 2270 | 742.54 |
|           | 1-linoleoyl-2-arachidonoyl-GPC (18:2/20:4n6)*     | 52710 |        |           |          |  |            | 1969 | 806.57 |
|           | arachidonoylcholine                               | 53261 |        |           |          |  |            | 1390 | 390.34 |
|           | dihomo-linolenoyl-choline                         | 53262 |        |           |          |  |            | 1424 | 392.35 |
|           | docosahexaenoylcholine                            | 53263 |        |           |          |  |            | 1378 | 414.34 |
|           | oleoylcholine                                     | 53260 |        |           |          |  |            | 1449 | 368.35 |
|           | palmitoleoylcholine                               | 53257 |        |           |          |  |            | 1385 | 340.32 |
| Lysolipid | 1-palmitoyl-GPC (16:0)                            | 33955 |        | HMDB10382 | 86554    |  | 17364-16-8 | 1525 | 496.34 |
|           | 2-palmitoyl-GPC (16:0)*                           | 35253 |        | HMDB61702 | 15061532 |  |            | 1505 | 496.34 |
|           | 1-palmitoleoyl-GPC (16:1)*                        | 33230 |        | HMDB10383 | 24779461 |  |            | 1450 | 494.32 |
|           | 2-palmitoleoyl-GPC (16:1)*                        | 35819 |        |           |          |  |            | 1425 | 494.32 |
|           | 1-stearoyl-GPC (18:0)                             | 33961 |        | HMDB10384 | 497299   |  | 19420-57-6 | 1606 | 524.37 |
|           | 1-oleoyl-GPC (18:1)                               | 48258 |        | HMDB02815 | 16081932 |  | 19420-56-5 | 1540 | 522.36 |
|           | 1-linoleoyl-GPC (18:2)                            | 34419 | C04100 | HMDB10386 | 11988421 |  |            | 1465 | 520.34 |
|           | 1-linolenoyl-GPC (18:3)*                          | 45951 |        |           |          |  |            | 1422 | 518.32 |
|           | 1-arachidonoyl-GPC (20:4n6)*                      | 33228 | C05208 | HMDB10395 |          |  |            | 1460 | 544.34 |
|           | 1-palmitoyl-GPE (16:0)                            | 35631 |        | HMDB11503 | 9547069  |  |            | 1544 | 454.29 |
|           | 1-stearoyl-GPE (18:0)                             | 42398 |        | HMDB11130 | 9547068  |  | 69747-55-3 | 1626 | 482.32 |
|           | 2-stearoyl-GPE (18:0)*                            | 41220 |        |           |          |  |            | 6350 | 480.31 |

|                         |                                                        |                                   |                                                  |           |           |          |            |             |        |        |        |
|-------------------------|--------------------------------------------------------|-----------------------------------|--------------------------------------------------|-----------|-----------|----------|------------|-------------|--------|--------|--------|
|                         |                                                        | 1-oleoyl-GPE (18:1)               | 35628                                            |           | HMDB11506 | 9547071  |            | 89576-29-4  | 1554   | 480.31 |        |
|                         |                                                        | 1-linoleoyl-GPE (18:2)*           | 36600                                            |           | HMDB11507 | 52925130 |            |             | 1482   | 478.29 |        |
|                         |                                                        | 1-arachidonoyl-GPE (20:4n6)*      | 35186                                            |           | HMDB11517 | 42607465 |            |             | 1450   | 502.29 |        |
|                         |                                                        | 1-palmitoyl-GPI (16:0)*           | 35305                                            |           | HMDB61695 |          |            |             | 5564   | 571.29 |        |
|                         |                                                        | 1-stearoyl-GPI (18:0)             | 19324                                            |           | HMDB61696 |          |            | 796963-93-4 | 1700   | 601.33 |        |
|                         |                                                        | 1-oleoyl-GPI (18:1)*              | 36602                                            |           |           |          |            |             | 5599   | 597.3  |        |
|                         |                                                        | 1-linoleoyl-GPI (18:2)*           | 36594                                            |           |           |          |            |             | 5494   | 595.29 |        |
|                         |                                                        | 1-arachidonoyl-GPI (20:4)*        | 34214                                            |           | HMDB61690 |          |            |             | 5482   | 619.29 |        |
|                         |                                                        | 1-palmitoyl-GPA (16:0)            | 34428                                            | C04036    | HMDB00327 | 6419701  |            | 17618-08-5  | 5600   | 409.24 |        |
|                         |                                                        | 1-arachidonoyl-GPA (20:4)         | 46325                                            |           |           |          |            | 799268-65-8 | 5499   | 457.24 |        |
|                         |                                                        | 1-oleoyl-GPA (18:1)               | 36812                                            |           |           | 5497152  |            | 325465-93-8 | 1635   | 437.27 |        |
|                         |                                                        | 1-linoleoyl-GPA (18:2)*           | 52690                                            |           | HMDB07856 |          |            |             | 5483   | 433.24 |        |
|                         |                                                        | Plasmalogen                       | 1-(1-enyl-palmitoyl)-2-oleoyl-GPE (P-16:0/18:1)* | 52477     |           |          |            |             |        | 2600   | 702.54 |
|                         | 1-(1-enyl-palmitoyl)-2-linoleoyl-GPE (P-16:0/18:2)*    |                                   | 52677                                            |           |           |          |            |             | 2351   | 700.53 |        |
|                         | 1-(1-enyl-palmitoyl)-2-palmitoyl-GPC (P-16:0/16:0)*    |                                   | 52716                                            |           |           | 11146967 |            |             | 2454   | 718.57 |        |
|                         | 1-(1-enyl-palmitoyl)-2-palmitoleoyl-GPC (P-16:0/16:1)* |                                   | 52713                                            |           |           |          |            |             | 2218   | 716.56 |        |
|                         | 1-(1-enyl-palmitoyl)-2-arachidonoyl-GPE (P-16:0/20:4)* |                                   | 52673                                            |           |           |          |            |             | 2270   | 724.53 |        |
|                         | 1-(1-enyl-palmitoyl)-2-oleoyl-GPC (P-16:0/18:1)*       |                                   | 52478                                            |           |           |          |            |             | 2443   | 744.59 |        |
|                         | 1-(1-enyl-stearoyl)-2-oleoyl-GPE (P-18:0/18:1)         |                                   | 52614                                            |           |           |          |            | 144371-68-6 | 2950   | 730.57 |        |
|                         | 1-(1-enyl-stearoyl)-2-linoleoyl-GPE (P-18:0/18:2)*     |                                   | 52748                                            |           |           |          |            |             | 2633   | 728.56 |        |
|                         | 1-(1-enyl-palmitoyl)-2-arachidonoyl-GPC (P-16:0/20:4)* |                                   | 52689                                            |           |           |          |            |             | 2154   | 766.57 |        |
|                         | 1-(1-enyl-palmitoyl)-2-linoleoyl-GPC (P-16:0/18:2)*    |                                   | 52682                                            |           |           |          |            |             | 2226   | 742.57 |        |
|                         | 1-(1-enyl-stearoyl)-2-arachidonoyl-GPE (P-18:0/20:4)*  |                                   | 52475                                            |           | HMDB05779 | 9547058  |            |             | 2511   | 752.56 |        |
|                         | Lysoplasmalogen                                        |                                   | 1-(1-enyl-palmitoyl)-GPC (P-16:0)*               | 52474     |           |          | 10917802   |             |        | 1547   | 480.34 |
|                         |                                                        |                                   | 1-(1-enyl-palmitoyl)-GPE (P-16:0)*               | 39270     |           |          |            |             |        | 1558   | 438.3  |
|                         |                                                        | 1-(1-enyl-oleoyl)-GPE (P-18:1)*   | 44621                                            |           |           |          |            |             | 1566   | 464.31 |        |
|                         |                                                        | 1-(1-enyl-stearoyl)-GPE (P-18:0)* | 39271                                            |           |           |          |            |             | 1649   | 466.33 |        |
| Glycerolipid Metabolism | glycerol                                               | 15122                             | C00116                                           | HMDB00131 | 753       |          | 56-81-5    | 758         | 91.04  |        |        |
|                         | glycerol 3-phosphate                                   | 43847                             | C00093                                           | HMDB00126 | 754       |          | 29849-82-9 | 580         | 173.02 |        |        |

|  |                  |                                                  |       |        |           |          |  |             |        |        |
|--|------------------|--------------------------------------------------|-------|--------|-----------|----------|--|-------------|--------|--------|
|  |                  | glycerophosphoglycerol                           | 48857 | C03274 |           | 439964   |  |             | 2430   | 245.04 |
|  | Monoacylglycerol | 1-myristoylglycerol (14:0)                       | 35625 | C01885 | HMDB11561 | 79050    |  | 75685-84-6  | 6353.3 | 227.2  |
|  |                  | 1-pentadecanoylglycerol (15:0)                   | 47898 |        |           | 190750   |  |             | 6200   | 241.22 |
|  |                  | 1-palmitoylglycerol (16:0)                       | 21127 |        | HMDB31074 | 14900    |  | 542-44-9    | 6400   | 255.23 |
|  |                  | 2-palmitoylglycerol (16:0)                       | 33419 |        | HMDB11533 | 123409   |  | 23470-00-0  | 6300   | 255.23 |
|  |                  | 1-oleoylglycerol (18:1)                          | 21184 |        | HMDB11567 | 5283468  |  | 111-03-5    | 6500   | 281.25 |
|  |                  | 2-oleoylglycerol (18:1)                          | 21232 |        |           | 5319879  |  | 3443-84-3   | 6300   | 281.25 |
|  |                  | 1-linoleoylglycerol (18:2)                       | 27447 |        |           | 5283469  |  | 2277-28-3   | 6477   | 279.23 |
|  |                  | 2-linoleoylglycerol (18:2)                       | 32506 |        | HMDB11538 | 5365676  |  | 3443-82-1   | 6250   | 279.23 |
|  |                  | 1-linolenoylglycerol (18:3)                      | 34393 |        | HMDB11569 | 53480978 |  |             | 6214   | 277.22 |
|  |                  | 1-arachidonoylglycerol (20:4)                    | 34397 | C13857 | HMDB11572 | 5282281  |  | 35474-99-8  | 6450   | 303.23 |
|  |                  | 2-arachidonoylglycerol (20:4)                    | 19266 | C13856 | HMDB04666 | 5282280  |  | 53847-30-6  | 6170   | 303.23 |
|  |                  | 1-docosahexaenoylglycerol (22:6)                 | 35153 |        | HMDB11587 |          |  |             | 6150   | 309.22 |
|  |                  | 1-dihomo-linolenylglycerol (20:3)                | 48341 |        |           |          |  |             | 6220   | 305.25 |
|  |                  | 1-palmitoleoylglycerol (16:1)*                   | 52431 |        |           |          |  |             | 6094   | 253.22 |
|  | Diacylglycerol   | diacylglycerol (16:1/18:2 [2], 16:0/18:3 [1])*   | 54966 |        |           |          |  |             | 2733   | 608.52 |
|  |                  | oleoyl-linoleoyl-glycerol (18:1/18:2) [1]        | 46798 |        |           |          |  | 106292-55-1 | 3115   | 636.56 |
|  |                  | oleoyl-linoleoyl-glycerol (18:1/18:2) [2]        | 46799 |        |           |          |  | 104346-53-4 | 3223   | 636.56 |
|  |                  | oleoyl-linolenoyl-glycerol (18:1/18:3) [2]*      | 54970 |        |           |          |  |             | 2819   | 634.54 |
|  |                  | oleoyl-arachidonoyl-glycerol (18:1/20:4) [2]*    | 54961 |        |           |          |  |             | 2990   | 660.56 |
|  |                  | linoleoyl-arachidonoyl-glycerol (18:2/20:4) [1]* | 54955 |        |           |          |  |             | 2566   | 658.54 |
|  |                  | linoleoyl-arachidonoyl-glycerol (18:2/20:4) [2]* | 54956 |        |           |          |  |             | 2624   | 658.54 |
|  |                  | linoleoyl-linoleoyl-glycerol (18:2/18:2) [1]*    | 54968 |        |           |          |  |             | 2689   | 634.54 |
|  |                  | linoleoyl-linolenoyl-glycerol (18:2/18:3) [1]*   | 54963 |        |           |          |  |             | 2426   | 632.52 |
|  |                  | linoleoyl-linolenoyl-glycerol (18:2/18:3) [2]*   | 54964 |        |           |          |  |             | 2478   | 632.52 |
|  |                  | palmitoyl-arachidonoyl-glycerol (16:0/20:4) [1]* | 54957 |        |           |          |  |             | 2916   | 634.54 |
|  |                  | palmitoyl-arachidonoyl-glycerol (16:0/20:4) [2]* | 54958 |        |           |          |  |             | 3015   | 634.54 |
|  |                  | palmitoleoyl-linoleoyl-glycerol (16:1/18:2) [1]* | 54967 |        |           |          |  |             | 2664   | 608.52 |

|                         |                                                     |                                                    |       |                      |           |             |                        |        |        |
|-------------------------|-----------------------------------------------------|----------------------------------------------------|-------|----------------------|-----------|-------------|------------------------|--------|--------|
|                         |                                                     | palmitoyl-oleoyl-glycerol (16:0/18:1) [1]*         | 54943 |                      |           |             |                        | 3562   | 612.56 |
|                         |                                                     | palmitoyl-oleoyl-glycerol (16:0/18:1) [2]*         | 54942 |                      |           |             |                        | 3695   | 612.56 |
|                         |                                                     | palmitoleoyl-oleoyl-glycerol (16:1/18:1) [1]*      | 52632 | HMDB07131            | 9543694   |             |                        | 3035   | 610.54 |
|                         |                                                     | palmitoleoyl-oleoyl-glycerol (16:1/18:1) [2]*      | 52631 |                      |           |             |                        | 3154   | 610.54 |
|                         |                                                     | palmitoyl-linoleoyl-glycerol (16:0/18:2) [1]*      | 52633 | HMDB05207, HMDB07103 | 9543695   |             |                        | 3080   | 610.54 |
|                         |                                                     | palmitoyl-linoleoyl-glycerol (16:0/18:2) [2]*      | 52634 |                      |           |             |                        | 3197   | 610.54 |
|                         |                                                     | palmitoyl-linolenoyl-glycerol (16:0/18:3) [2]*     | 54965 |                      |           |             |                        | 2834   | 608.52 |
|                         |                                                     | stearoyl-linoleoyl-glycerol (18:0/18:2) [2]*       | 54947 |                      |           |             |                        | 3762   | 638.57 |
|                         |                                                     | oleoyl-oleoyl-glycerol (18:1/18:1) [1]*            | 54945 |                      |           |             |                        | 3571   | 638.57 |
|                         |                                                     | oleoyl-oleoyl-glycerol (18:1/18:1) [2]*            | 54946 |                      |           |             |                        | 3695   | 638.57 |
|                         |                                                     | stearoyl-linoleoyl-glycerol (18:0/18:2) [1]*       | 54948 |                      |           |             |                        | 3650   | 638.57 |
| Sphingolipid Metabolism |                                                     | sphinganine-1-phosphate                            | 52605 | HMDB01383            | 520       |             | 19794-97-9             | 1431   | 382.27 |
|                         |                                                     | N-palmitoyl-sphinganine (d18:0/16:0)               | 52604 | HMDB11760            | 5283572   |             | 5966-29-0              | 3090   | 540.54 |
|                         |                                                     | N-behenoyl-sphingadienine (d18:2/22:0)*            | 57372 |                      |           |             |                        | 3911   | 620.6  |
|                         |                                                     | myristoyl dihydro sphingomyelin (d18:0/14:0)*      | 57365 |                      |           |             |                        | 2060   | 677.56 |
|                         |                                                     | palmitoyl dihydro sphingomyelin (d18:0/16:0)*      | 52434 |                      | 9939965   |             |                        | 2290   | 705.59 |
|                         |                                                     | behenoyl dihydro sphingomyelin (d18:0/22:0)*       | 57331 |                      |           |             |                        | 3150   | 789.68 |
|                         |                                                     | stearoyl sphingomyelin (d18:1/18:0)                | 19503 | C00550               | HMDB01348 | 6453725     | 85187-10-6; 85187-10-6 | 2400   | 731.61 |
|                         |                                                     | tricosanoyl sphingomyelin (d18:1/23:0)*            | 52436 |                      |           |             |                        | 3200   | 801.68 |
|                         |                                                     | sphingomyelin (d18:1/14:0, d16:1/16:0)*            | 42463 |                      |           | 11433862    |                        | 1998   | 675.54 |
|                         |                                                     | sphingomyelin (d18:2/14:0, d18:1/14:1)*            | 47154 |                      |           |             |                        | 1860   | 673.53 |
|                         |                                                     | sphingomyelin (d18:1/15:0, d16:1/17:0)*            | 52433 |                      |           |             | 121999-58-4            | 2082   | 689.56 |
|                         |                                                     | sphingomyelin (d18:2/16:0, d18:1/16:1)*            | 42459 |                      |           |             |                        | 2002   | 701.56 |
|                         |                                                     | sphingomyelin (d18:1/17:0, d17:1/18:0, d19:1/16:0) | 52615 |                      |           |             | 121999-64-2            | 2312   | 717.59 |
|                         |                                                     | sphingomyelin (d18:1/18:1, d18:2/18:0)             | 37529 |                      |           | 6443882     | 108392-10-5            | 2167   | 729.59 |
|                         |                                                     | sphingomyelin (d18:1/20:0, d16:1/22:0)*            | 48490 |                      |           |             |                        | 2685   | 759.64 |
|                         | sphingomyelin (d18:1/20:1, d18:2/20:0)*             | 48491                                              |       |                      |           | 222403-67-0 | 2383                   | 757.62 |        |
|                         | sphingomyelin (d18:1/21:0, d17:1/22:0, d16:1/23:0)* | 52495                                              |       |                      |           |             | 2793                   | 773.65 |        |



|  |                                |                                                     |       |        |           |          |  |                   |        |        |
|--|--------------------------------|-----------------------------------------------------|-------|--------|-----------|----------|--|-------------------|--------|--------|
|  |                                | androsterone sulfate                                | 31591 |        | HMDB02759 | 159663   |  | 2479-86-9         | 5022   | 369.17 |
|  |                                | 4-androsten-3beta,17beta-diol monosulfate (1)       | 37211 |        | HMDB03818 |          |  | 521-17-5          | 4500   | 369.17 |
|  |                                | 4-androsten-3beta,17beta-diol monosulfate (2)       | 37210 |        |           |          |  |                   | 4500   | 369.17 |
|  |                                | 4-androsten-3alpha,17alpha-diol monosulfate (2)     | 37207 |        |           |          |  |                   | 4712   | 369.17 |
|  |                                | 4-androsten-3alpha,17alpha-diol monosulfate (3)     | 37209 |        |           |          |  |                   | 5180   | 369.17 |
|  |                                | 4-androsten-3beta,17beta-diol disulfate (1)         | 37202 | C04295 | HMDB03818 | 10634    |  |                   | 3740   | 224.06 |
|  |                                | 4-androsten-3beta,17beta-diol disulfate (2)         | 37203 | C04295 | HMDB03818 | 10634    |  |                   | 4065   | 224.06 |
|  |                                | 5alpha-androstan-3alpha,17beta-diol monosulfate (1) | 37186 |        |           |          |  |                   | 4925   | 371.19 |
|  |                                | 5alpha-androstan-3beta,17beta-diol monosulfate (2)  | 37192 |        |           |          |  |                   | 4685   | 371.19 |
|  |                                | 5alpha-androstan-3beta,17beta-diol disulfate        | 37190 | C12525 | HMDB00493 | 242332   |  | 571-20-0          | 3880   | 225.07 |
|  |                                | andro steroid monosulfate (1)*                      | 32827 | C04555 | HMDB02759 |          |  |                   | 3871   | 383.15 |
|  |                                | etiocolanolone glucuronide                          | 47112 |        |           |          |  | 9/3/02            | 4915   | 465.25 |
|  | Primary Bile Acid Metabolism   | cholate                                             | 22842 | C00695 | HMDB00619 | 221493   |  | 81-25-4           | 5165   | 407.28 |
|  |                                | glycocholate                                        | 18476 | C01921 | HMDB00138 | 10140    |  | 475-31-0;863-57-0 | 5163   | 464.3  |
|  |                                | chenodeoxycholate                                   | 1563  | C02528 | HMDB00518 | 10133    |  | 474-24-9;474-25-9 | 5264   | 391.29 |
|  |                                | glycochenodeoxycholate                              | 32346 | C05466 | HMDB00637 | 12544    |  | 16564-43-5        | 5236.1 | 448.31 |
|  |                                | taurochenodeoxycholate                              | 18494 | C05465 | HMDB00951 | 387316   |  | 6009-98-9         | 5250   | 498.29 |
|  |                                | deoxycholate                                        | 1114  | C04483 | HMDB00626 | 222528   |  | 83-44-3           | 5294   | 391.29 |
|  | Secondary Bile Acid Metabolism | glycodeoxycholate                                   | 18477 | C05464 | HMDB00631 | 3035026  |  | 360-65-6          | 5281   | 448.31 |
|  |                                | taurodeoxycholate                                   | 12261 | C05463 | HMDB00896 | 2733768  |  | 207737-97-1       | 5257.4 | 498.29 |
|  |                                | glycolithocholate sulfate*                          | 32620 | C11301 | HMDB02639 | 72222    |  | 15324-64-8        | 5011   | 255.63 |
|  |                                | ursodeoxycholate                                    | 1605  | C07880 | HMDB00946 | 31401    |  | 128-13-2          | 5055   | 391.29 |
|  |                                | glycoursodeoxycholate                               | 39379 |        | HMDB00708 | 12310288 |  | 64480-66-6        | 5033   | 448.31 |
|  |                                | glycocholenate sulfate*                             | 32599 |        |           |          |  |                   | 4750   | 254.62 |
|  |                                | taurocholenate sulfate                              | 32807 |        |           |          |  |                   | 4750   | 279.61 |
|  |                                | glycodeoxycholate sulfate                           | 52975 |        |           |          |  |                   | 4875   | 263.63 |

|            |                                                      |                                 |                    |        |           |           |       |                  |          |        |        |
|------------|------------------------------------------------------|---------------------------------|--------------------|--------|-----------|-----------|-------|------------------|----------|--------|--------|
|            | Fatty Acid Metabolism (Acyl Choline)                 | palmitoylcholine                | 52944              |        |           | 151731    |       | 1482             | 342.34   |        |        |
| Nucleotide | Purine Metabolism, (Hypo)Xanthine/Inosine containing | inosine                         | 1123               | C00294 | HMDB00195 | 6021      |       | 58-63-9          | 1602.1   | 267.07 |        |
|            |                                                      | hypoxanthine                    | 3127               | C00262 | HMDB00157 | 790       |       | 68-94-0          | 1291.2   | 135.03 |        |
|            |                                                      | xanthine                        | 3147               | C00385 | HMDB00292 | 1188      |       | 69-89-6          | 1032     | 153.04 |        |
|            |                                                      | N1-methylinosine                | 48351              |        | HMDB02721 | 65095     |       | 20245-33-4       | 1430     | 283.1  |        |
|            |                                                      | urate                           | 1604               | C00366 | HMDB00289 | 1175      |       | 69-93-2;120K5305 | 757.1    | 167.02 |        |
|            |                                                      | allantoin                       | 1107               | C02350 | HMDB00462 | 204       |       | 97-59-6          | 1672     | 157.04 |        |
|            |                                                      |                                 |                    |        |           |           |       |                  |          |        |        |
|            | Purine Metabolism, Adenine containing                | N1-methyladenosine              | 15650              | C02494 | HMDB03331 | 27476     |       | 15763-06-1       | 2120     | 282.12 |        |
|            |                                                      | N6-carbamoylthreonyladenosine   | 35157              |        | HMDB41623 | 161466    |       | 24719-82-2       | 2164     | 411.13 |        |
|            | Purine Metabolism, Guanine containing                | 7-methylguanine                 | 35114              | C02242 | HMDB00897 | 11361     |       | 578-76-7         | 2175     | 166.07 |        |
|            |                                                      |                                 |                    |        |           |           |       |                  |          |        |        |
|            | Pyrimidine Metabolism, Orotate containing            | orotate                         | 1505               | C00295 | HMDB00226 | 967       |       | 50887-69-9       | 1638.1   | 155.01 |        |
|            |                                                      | orotidine                       | 35172              | C01103 | HMDB00788 | 92751     |       | 314-50-1         | 2250     | 287.05 |        |
|            | Pyrimidine Metabolism, Uracil containing             | uridine                         | 606                | C00299 | HMDB00296 | 6029      |       | 58-96-8          | 1457.6   | 243.06 |        |
|            |                                                      | pseudouridine                   | 33442              | C02067 | HMDB00767 | 15047     |       | 1445-07-4        | 1100     | 243.06 |        |
|            |                                                      | 5-methyluridine (ribothymidine) | 35136              |        | HMDB00884 | 445408    |       | 1463-10-1        | 1778.1   | 257.08 |        |
|            |                                                      | 2'-deoxyuridine                 | 52602              | C00526 | HMDB00012 | 13712     |       | 951-78-0         | 1586     | 227.07 |        |
|            |                                                      | 3-ureidopropionate              | 3155               | C02642 | HMDB00026 | 111       |       | 462-88-4         | 875      | 133.06 |        |
|            |                                                      | beta-alanine                    | 55                 | C00099 | HMDB00056 | 239       |       | 56-41-7;107-95-9 | 1905     | 90.05  |        |
|            |                                                      | N-acetyl-beta-alanine           | 37432              | C01073 |           | 76406     |       | 3025-95-4        | 773      | 130.05 |        |
|            |                                                      |                                 |                    |        |           |           |       |                  |          |        |        |
|            |                                                      |                                 | 5,6-dihydrothymine | 1418   | C00906    | HMDB00079 | 93556 |                  | 696-04-8 | 1280   | 129.07 |



|                        |                                           |                                    |        |           |           |          |         |                        |        |        |  |
|------------------------|-------------------------------------------|------------------------------------|--------|-----------|-----------|----------|---------|------------------------|--------|--------|--|
|                        | Pyrimidine Metabolism, Thymine containing |                                    |        |           |           |          |         |                        |        |        |  |
|                        |                                           | 3-aminoisobutyrate                 | 1566   | C05145    | HMDB03911 | 64956    |         | 10569-72-9;214139-20-5 | 2215   | 104.07 |  |
| Cofactors and Vitamins | Nicotinate and Nicotinamide Metabolism    | quinolinate                        | 1899   | C03722    | HMDB00232 | 1066     |         | 89-00-9                | 3000   | 166.01 |  |
|                        |                                           | nicotinamide                       | 594    | C00153    | HMDB01406 | 936      |         | 98-92-0                | 1942   | 123.06 |  |
|                        |                                           | 1-methylnicotinamide               | 27665  | C02918    | HMDB00699 | 10129985 |         | 1005-24-9              | 1940   | 137.07 |  |
|                        |                                           | trigonelline (N'-methylnicotinate) | 32401  | C01004    | HMDB00875 | 5570     |         | 535-83-1               | 1388   | 138.05 |  |
|                        |                                           | N1-Methyl-2-pyridone-5-carboxamide | 40469  | C05842    | HMDB04193 | 69698    |         | 701-44-0               | 1250   | 153.07 |  |
|                        | Pantothenate and CoA Metabolism           |                                    |        |           |           |          |         |                        |        |        |  |
|                        |                                           | pantothenate                       | 1508   | C00864    | HMDB00210 | 6613     |         | 137-08-6               | 1498.7 | 218.1  |  |
|                        | Ascorbate and Aldarate Metabolism         | threonate                          | 27738  | C01620    | HMDB00943 | 151152   |         | 70753-61-6             | 2384   | 135.03 |  |
|                        |                                           | oxalate (ethanedioate)             | 20694  | C00209    | HMDB02329 | 971      |         | 144-62-7               | 603    | 88.99  |  |
|                        |                                           | gulonate*                          | 46957  |           | HMDB03290 | 9794176  |         | 20246-53-1             | 2750   | 195.05 |  |
|                        | Tocopherol Metabolism                     | alpha-tocopherol                   | 1561   | C02477    | HMDB01893 | 14985    |         | 59-02-9;10191-41-0     | 2522   | 430.38 |  |
|                        |                                           | gamma-CEHC                         | 44876  |           | HMDB01931 | 133098   |         | 178167-75-4            | 3843   | 263.13 |  |
|                        |                                           | gamma-tocopherol/beta-tocopherol   | 52473  |           |           |          |         |                        | 2384   | 416.36 |  |
|                        | Hemoglobin and Porphyrin Metabolism       | bilirubin (Z,Z)                    | 43807  | C00486    | HMDB00054 | 5280352  |         | 635-65-4               | 1840   | 585.27 |  |
|                        |                                           | bilirubin (E,E)*                   | 32586  |           |           | 5315454  |         | 114-25-0               | 4294   | 583.26 |  |
|                        |                                           | biliverdin                         | 2137   | C00500    | HMDB01008 | 5353439  |         | 55482-27-4;55482-27-4  | 1016   | 583.26 |  |
|                        | Vitamin A Metabolism                      |                                    |        |           |           |          |         |                        |        |        |  |
|                        |                                           | retinol (Vitamin A)                | 1806   | C00473    | HMDB00305 | 445354   |         | 68-26-8                | 1636   | 269.23 |  |
| Vitamin B6 Metabolism  |                                           |                                    |        |           |           |          |         |                        |        |        |  |
|                        | pyridoxate                                | 31555                              | C00847 | HMDB00017 | 6723      |          | 82-82-6 | 2185                   | 182.05 |        |  |

|                          |                                      |                                   |          |           |                      |           |           |            |         |        |
|--------------------------|--------------------------------------|-----------------------------------|----------|-----------|----------------------|-----------|-----------|------------|---------|--------|
| Xenobiotics              | Benzoate Metabolism                  | hippurate                         | 15753    | C01586    | HMDB00714            | 464       |           | 495-69-2   | 2106.9  | 178.05 |
|                          |                                      | 2-hydroxyhippurate (salicylurate) | 18281    | C07588    | HMDB00840            | 10253     |           | 487-54-7   | 2184    | 194.05 |
|                          |                                      | 3-hydroxyhippurate                | 39600    |           | HMDB06116            | 450268    |           | 1637-75-8  | 1687    | 194.05 |
|                          |                                      | 4-hydroxyhippurate                | 35527    |           | HMDB13678            | 151012    |           | 2482-25-9  | 1475    | 194.05 |
|                          |                                      | benzoate                          | 15778    | C00180    | HMDB01870            | 243       |           | 65-85-0    | 1750    | 121.03 |
|                          |                                      | catechol sulfate                  | 35320    | C00090    | HMDB59724            | 3083879   |           | 4918-96-1  | 1906    | 188.99 |
|                          |                                      | O-methylcatechol sulfate          | 46111    |           |                      | 22473     |           |            | 2344    | 203    |
|                          |                                      | 3-methyl catechol sulfate (1)     | 46165    |           |                      |           |           |            | 2790    | 203    |
|                          |                                      | 4-methylcatechol sulfate          | 46146    |           |                      |           |           |            | 2665    | 203    |
|                          |                                      | 4-ethylphenylsulfate              | 36099    | C13637    |                      |           |           | 123-07-9   | 3580    | 201.02 |
|                          |                                      | 4-vinylphenol sulfate             | 36098    | C05627    | HMDB04072            | 6426766   |           | 2628-17-3  | 3320    | 199.01 |
|                          |                                      | 3-methoxycatechol sulfate (1)     | 48763    |           |                      |           |           |            | 2163    | 219    |
|                          |                                      | methyl-4-hydroxybenzoate sulfate  | 48429    |           |                      |           |           |            | 2873    | 231    |
|                          |                                      | Xanthine Metabolism               | caffeine | 569       | C07481               | HMDB01847 | 2519      |            | 58-08-2 | 2106   |
|                          | paraxanthine                         |                                   | 18254    | C13747    | HMDB01860            | 4687      |           | 611-59-6   | 2279    | 179.06 |
|                          | theobromine                          |                                   | 18392    | C07480    | HMDB02825            | 5429      |           | 83-67-0    | 1600    | 181.07 |
|                          | theophylline                         |                                   | 18394    | C07130    | HMDB01889            | 2153      |           | 58-55-9    | 1870    | 181.07 |
|                          | 1-methylurate                        |                                   | 34395    | C16359    | HMDB03099            | 69726     |           | 708-79-2   | 1900    | 181.04 |
|                          | 7-methylurate                        |                                   | 39598    |           |                      | 69160     |           | 612-37-3   | 1138    | 181.04 |
|                          | 1,3-dimethylurate                    |                                   | 32391    |           | HMDB01857            | 70346     |           | 944-73-0   | 1671.4  | 195.05 |
|                          | 1,7-dimethylurate                    |                                   | 34400    | C16356    | HMDB11103            | 91611     |           | 33868-03-0 | 1578.6  | 195.05 |
|                          | 1,3,7-trimethylurate                 |                                   | 34404    | C16361    | HMDB02123            | 79437     |           | 5415-44-1  | 1985    | 209.07 |
|                          | 1-methylxanthine                     |                                   | 34389    | C16358    | HMDB10738            | 80220     |           | 6136-37-4  | 1568.8  | 165.04 |
|                          | 3-methylxanthine                     |                                   | 32445    | C16357    | HMDB01886            | 70639     |           | 1076-22-8  | 1700    | 165.04 |
|                          | 7-methylxanthine                     |                                   | 34390    | C16353    | HMDB01991            | 68374     |           | 552-62-5   | 1350    | 167.06 |
|                          | 5-acetylamino-6-amino-3-methyluracil |                                   | 34424    | C16366    | HMDB04400            | 88299     |           | 19893-78-8 | 1710    | 197.07 |
|                          | Food Component/<br>Plant             | retinal                           | 40807    | C00376    | HMDB01358, HMDB06218 | 638015    |           |            | 1666    | 285.22 |
| 2,3-dihydroxyisovalerate |                                      | 38276                             | C04039   | HMDB12141 | 677                  |           | 1756-18-9 | 1050       | 133.05  |        |
| 2-isopropylmalate        |                                      | 15667                             | C02504   | HMDB00402 | 77                   |           | 3237-44-3 | 2605       | 175.06  |        |

|  |                      |                                       |       |        |                                 |         |  |                     |        |        |
|--|----------------------|---------------------------------------|-------|--------|---------------------------------|---------|--|---------------------|--------|--------|
|  |                      | gluconate                             | 587   | C00257 | HMDB00625                       | 10690   |  | 527-07-1            | 2922   | 195.05 |
|  |                      | cinnamoylglycine                      | 38637 |        | HMDB11621                       | 709625  |  | 16534-24-0          | 3127   | 204.07 |
|  |                      | dihydroferulic acid                   | 40481 |        |                                 | 14340   |  | 1135-23-5           | 1928   | 195.07 |
|  |                      | ergothioneine                         | 37459 | C05570 | HMDB03045                       | 3032311 |  | 58511-63-0          | 850    | 230.1  |
|  |                      | erythritol                            | 20699 | C00503 | HMDB02994                       | 222285  |  | 149-32-6            | 1491   | 167.06 |
|  |                      | homostachydrine*                      | 33009 | C08283 | HMDB33433                       | 441447  |  | 1195-94-4           | 1750   | 158.12 |
|  |                      | methyl indole-3-acetate               | 1584  |        | HMDB29738                       | 74706   |  | 1912-33-0           | 3339   | 190.09 |
|  |                      | N-(2-furoyl)glycine                   | 31536 |        | HMDB00439                       | 21863   |  | 5657-19-2;5657-19-2 | 1525.8 | 168.03 |
|  |                      | phytanate                             | 598   | C01607 | HMDB00417, HMDB00801, HMDB00553 | 26840   |  | 14721-66-5          | 5908   | 311.3  |
|  |                      | piperine                              | 33935 | C03882 | HMDB29377                       | 638024  |  | 94-62-2             | 1168   | 286.14 |
|  |                      | quinatate                             | 18335 | C00296 | HMDB03072                       | 6508    |  | 77-95-2             | 2432.9 | 191.06 |
|  |                      | S-allylcysteine                       | 43239 |        |                                 | 98280   |  | 21593-77-1          | 2690   | 162.06 |
|  |                      | stachydrine                           | 34384 | C10172 | HMDB04827                       | 115244  |  | 4136-37-2           | 1440   | 144.1  |
|  |                      | thymol sulfate                        | 36095 | C09908 | HMDB01878                       |         |  | 89-83-8             | 4410   | 229.05 |
|  |                      | 4-allylphenol sulfate                 | 37181 |        |                                 |         |  |                     | 3805   | 213.02 |
|  |                      | methyl glucopyranoside (alpha + beta) | 46144 |        |                                 |         |  |                     | 1070   | 193.07 |
|  |                      | pyrraline                             | 48428 |        |                                 |         |  | 74509-14-1          | 2304   | 253.12 |
|  |                      | 2-keto-3-deoxy-gluconate              | 48141 |        | HMDB01353                       | 161227  |  | 17510-99-5          | 1900   | 177.04 |
|  | Bacterial/<br>Fungal | tartronate (hydroxymalonate)          | 20693 | C02287 | HMDB35227                       | 45      |  | 80-69-3             | 610    | 119    |
|  | Drug                 | hydroquinone sulfate                  | 35322 | C00530 | HMDB02434                       | 161220  |  | 123-31-9            | 1395   | 188.99 |
|  |                      | salicylate                            | 1515  | C00805 | HMDB01895                       | 338     |  | 69-72-7             | 802    | 137.02 |
|  | Chemical             | 2-pyrrolidinone                       | 31675 |        | HMDB02039                       | 12025   |  | 616-45-5            | 1262   | 86.06  |
|  |                      | sulfate*                              | 46960 | C00059 | HMDB01448                       | 1118    |  | 14808-79-8          | 616    | 96.96  |
|  |                      | O-sulfo-L-tyrosine                    | 45413 |        |                                 | 514186  |  |                     | 990    | 260.02 |

|  |                                |       |        |           |                   |  |            |        |        |
|--|--------------------------------|-------|--------|-----------|-------------------|--|------------|--------|--------|
|  | 2-aminophenol sulfate          | 43266 |        | HMDB61116 | 181670            |  |            | 1677   | 188    |
|  | dimethyl sulfone               | 43424 | C11142 | HMDB04983 | 6213              |  | 67-71-0    | 832    | 95.02  |
|  | ectoine                        | 35651 | C06231 |           | 126041            |  | 96702-03-3 | 1980   | 143.08 |
|  | lanthionine                    | 42002 |        |           | 6994972;98504     |  | 8/2/83     | 1730   | 209.06 |
|  | succinimide                    | 41888 | C07273 |           | 11439             |  | 123-56-8   | 2155   | 116.04 |
|  | N-methylpiperolate             | 47101 |        |           | 11862129;11286529 |  | 41447-17-0 | 1932   | 144.1  |
|  | 4-hydroxychlorothalonil        | 48441 |        |           | 34217             |  | 28343-61-5 | 4427   | 244.91 |
|  | 1,2,3-benzenetriol sulfate (2) | 48762 |        |           |                   |  |            | 1709   | 204.98 |
|  | 3-hydroxypyridine sulfate      | 48448 |        |           |                   |  | 1955-23-3  | 1595.5 | 173.99 |
|  | 6-hydroxyindole sulfate        | 48698 |        |           |                   |  |            | 2498   | 212    |

**Table S2. Fold Changes of Metabolites in Refined Profile**

**Fold Change: Resistant<sub>WTC-LI</sub>/Control**

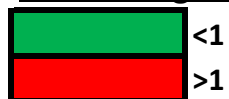

| Super Pathway | Sub Pathway                                      | Metabolite                                  | Comp ID               | KEGG      | HMDB      | PubChem   | Resistant <sub>WTC-LI</sub><br>Control | CAS        | Retention Index | Mass   |
|---------------|--------------------------------------------------|---------------------------------------------|-----------------------|-----------|-----------|-----------|----------------------------------------|------------|-----------------|--------|
| Amino Acid    | Glycine, Serine and Threonine Metabolism         | Serine                                      | 1648                  | C00065    | HMDB00187 | 5951      |                                        | 56-45-1    | 1239            | 106.05 |
|               |                                                  | Phenylalanine and Tyrosine Metabolism       | N-acetylphenylalanine | 33950     | C03519    | HMDB00512 | 74839                                  |            | 2018-61-3       | 2597   |
|               | Tryptophan Metabolism                            |                                             | N-acetyltryptophan    | 33959     | C03137    | HMDB13713 | 700653                                 |            | 1218-34-4       | 2630   |
|               |                                                  | Serotonin                                   | 2342                  | C00780    | HMDB00259 | 5202      |                                        | 153-98-0   | 2550            | 177.1  |
|               | Leucine, Isoleucine and Valine Metabolism        | N-acetylleucine                             | 1587                  | C02710    | HMDB11756 | 70912     |                                        | 1188-21-2  | 2400            | 172.1  |
|               |                                                  | Isovalerylglycine                           | 35107                 |           | HMDB00678 | 546304    |                                        | 16284-60-9 | 1950            | 158.08 |
|               |                                                  | N-acetylisoleucine                          | 33967                 |           |           | 2802421   |                                        | 3077-46-1  | 2325            | 172.1  |
|               |                                                  | Isobutyrylglycine                           | 35437                 |           | HMDB00730 | 10855600  |                                        | 15926-18-8 | 1420            | 144.07 |
|               | Methionine, Cysteine, SAM and Taurine Metabolism | N-formylmethionine                          | 2829                  | C03145    | HMDB01015 | 439750    |                                        | 4289-98-9  | 1543.8          | 176.04 |
|               |                                                  | Urea cycle; Arginine and Proline Metabolism | Arginine              | 1638      | C00062    | HMDB00517 | 232                                    |            | 1119-34-2       | 2825   |
| Citrulline    | 2132                                             |                                             | C00327                | HMDB00904 | 9750      |           | 372-75-8                               | 1520       | 176.1           |        |
| Carbohydrate  | Pentose Metabolism                               | Arabinose                                   | 575                   | C00216    | HMDB00646 | 66308     |                                        | 28697-53-2 | 1804.5          | 195.05 |
|               |                                                  | Ribulose/xylulose                           | 54671                 |           |           |           |                                        |            | 1400            | 195.05 |

|        |                                              |                                                |                                 |        |           |           |        |                   |                      |        |
|--------|----------------------------------------------|------------------------------------------------|---------------------------------|--------|-----------|-----------|--------|-------------------|----------------------|--------|
| Energy | TCA Cycle                                    | Malate                                         | 1303                            | C00149 | HMDB00156 | 525       |        | 6915-15-7         | 615.6                | 133.01 |
|        |                                              | Polyunsaturated Fatty Acid (n3 and n6)         | Eicosapentaenoate (EPA; 20:5n3) | 18467  | C06428    | HMDB01999 | 446284 |                   | 10-2005-9;10417-94-4 | 5450   |
| Lipid  | Fatty Acid Metabolism (also BCAA Metabolism) | Methylmalonate (MMA)                           | 1496                            | C02170 | HMDB00202 | 487       |        | 516-05-2          | 3078.4               | 117.02 |
|        |                                              | Fatty Acid Metabolism(Acyl Glycine)            | N-palmitoylglycine              | 42092  |           |           | 151008 |                   | 2441-41-0            | 5580   |
|        | Fatty Acid, Monohydroxy                      | 2-hydroxypalmitate                             | 35675                           |        | HMDB31057 | 92836     |        | 764-67-0          | 5511.2               | 271.23 |
|        |                                              | 2-hydroxystearate                              | 17945                           | C03045 |           | 69417     |        | 629-22-1          | 5695                 | 299.26 |
|        |                                              | 2-hydroxylaurate                               | 52916                           |        |           | 97783     |        | 2984-55-6         | 5211                 | 215.17 |
|        | Phospholipid Metabolism                      | 1-stearoyl-2-arachidonoyl-GPC (18:0/20:4)      | 42450                           |        |           | 16219824  |        | 35418-59-8        | 2300                 | 810.6  |
|        |                                              | 1-linoleoyl-2-arachidonoyl-GPC (18:2/20:4n6)*  | 52710                           |        |           |           |        |                   | 1969                 | 806.57 |
|        |                                              | Dihomo-linolenoyl-choline                      | 53262                           |        |           |           |        |                   | 1424                 | 392.35 |
|        |                                              | Oleoylcholine                                  | 53260                           |        |           |           |        |                   | 1449                 | 368.35 |
|        | Lysolipid                                    | 2-palmitoyl-GPC (16:0)*                        | 35253                           |        | HMDB61702 | 15061532  |        |                   | 1505                 | 496.34 |
|        | Sterol                                       | 7-alpha-hydroxy-3-oxo-4-cholestenoate (7-Hoca) | 36776                           | C17337 | HMDB12458 | 3081085   |        | 115538-85-7       | 5288.1               | 429.3  |
|        | Primary Bile Acid Metabolism                 | Chenodeoxycholate                              | 1563                            | C02528 | HMDB00518 | 10133     |        | 474-24-9;474-25-9 | 5264                 | 391.29 |

|             |                                           |             |       |        |                                       |       |  |            |        |        |
|-------------|-------------------------------------------|-------------|-------|--------|---------------------------------------|-------|--|------------|--------|--------|
| Nucleotide  | Pyrimidine Metabolism, Orotate containing | Orotate     | 1505  | C00295 | HMDB00226                             | 967   |  | 50887-69-9 | 1638.1 | 155.01 |
| Xenobiotics | Xanthine Metabolism                       | Theobromine | 18392 | C07480 | HMDB02825                             | 5429  |  | 83-67-0    | 1600   | 181.07 |
|             | Food Component/Plant                      | Phytanate   | 598   | C01607 | HMDB00417,<br>HMDB00801,<br>HMDB00553 | 26840 |  | 14721-66-5 | 5908   | 311.3  |
